1 Quantitative live-cell imaging yields novel insight into endogenous  
2 WNT/CTNNB1 signaling dynamics

3 Author information

4 S.M.A. de Man<sup>1</sup>, G. Zwanenburg<sup>2,^</sup>, M.A. Hink<sup>1,3,\*,^</sup>, R. van Amerongen<sup>1,\*,^,#</sup>

5 <sup>1</sup> Swammerdam Institute for Life Sciences, Section of Molecular Cytology, University of Amsterdam,  
6 Amsterdam, the Netherlands.

7 <sup>2</sup> Swammerdam Institute for Life Sciences, Biosystems Data Analysis Group, University of  
8 Amsterdam, Amsterdam, The Netherlands

9 <sup>3</sup> Swammerdam Institute for Life Sciences, van Leeuwenhoek Centre for Advanced Microscopy,  
10 University of Amsterdam, Amsterdam, the Netherlands.

11 \* These authors contributed equally

12 ^ corresponding authors: [r.vanamerongen@uva.nl](mailto:r.vanamerongen@uva.nl) (RvA), [m.a.hink@uva.nl](mailto:m.a.hink@uva.nl) (MAH),  
13 [g.zwanenburg@uva.nl](mailto:g.zwanenburg@uva.nl) (GZ)

14 # Twitter: @wntlab

## 15 Abstract

16 WNT/CTNNB1 signaling regulates tissue development and homeostasis in all multicellular  
17 animals. Multiple aspects of the underlying molecular mechanism remain poorly understood  
18 and critical information on endogenous WNT/CTNNB1 signaling dynamics is missing. Here we  
19 combine CRISPR/Cas9-mediated genome editing and quantitative live-cell microscopy to  
20 measure diffusion characteristics of fluorescently tagged, endogenous CTNNB1 in human cells  
21 with high spatiotemporal resolution. State-of-the-art functional imaging reveals that both in  
22 the absence and presence of WNT, a substantial fraction of CTNNB1 resides in slow-diffusing  
23 complexes in the cytoplasm and that WNT stimulation changes their identity. We also  
24 measure the concentration of complexed and free CTNNB1 in both the cytoplasm and the  
25 nucleus before and after WNT stimulation, and use these parameters to build a minimal  
26 computational model of WNT/CTNNB1 signaling. Our work reveals that WNT regulates the  
27 dynamic distribution of CTNNB1 across different functional pools by modulating the  
28 destruction complex, nucleocytoplasmic shuttling and nuclear retention.

## 29 Introduction

30 WNT signaling is one of the most ancient pattern-forming cell signaling cascades. It drives  
31 many biological processes from the onset of embryogenesis until adulthood in all multicellular  
32 animals (reviewed in van Amerongen and Nusse, 2009; Holstein, 2012; Loh et al., 2016). WNT  
33 signaling remains important throughout the lifespan of the organism and controls stem cell  
34 maintenance in many mammalian tissues, including the breast, intestine and skin (Barker et  
35 al., 2007; Lim et al., 2013; van Amerongen, Bowman, & Nusse, 2012). Disruption of the  
36 pathway causes disease, with hyperactivation being a frequent event in human colorectal and  
37 other cancers (reviewed in Nusse and Clevers, 2017; Polakis, 2000; Wiese et al., 2018; Zhan  
38 et al., 2017).

39 The key regulatory event in WNT/CTNNB1 signaling (traditionally known as ‘canonical WNT  
40 signaling’) is the accumulation and nuclear translocation of the transcriptional co-activator  
41 beta-catenin (CTNNB1). In the absence of WNT signaling, rapid turnover by the so-called  
42 destruction complex maintains low levels of CTNNB1 (Figure 1A). The destruction complex  
43 consists of the scaffold proteins APC and AXIN, which bind CTNNB1, and the serine/threonine  
44 kinases CSNK1 and GSK3, which subsequently phosphorylate residues S45, T41, S37 and S33  
45 (Amit et al., 2002; C. Liu et al., 2002). This primes CTNNB1 for ubiquitination by E3 Ubiquitin  
46 Protein Ligase BTRC and subsequent proteasomal degradation (Aberle, Bauer, Stappert,  
47 Kispert, & Kemler, 1997; Latres, Chiaur, & Pagano, 1999). In the current working model for  
48 WNT/CTNNB1 signaling, binding of WNT ligands to the FZD/LRP receptor complex sequesters  
49 and inhibits the destruction complex at the membrane in a process that involves DVL (Bilic et  
50 al., 2007; Schwarz-Romond et al., 2007). This allows newly synthesized CTNNB1 to accumulate  
51 (Figure 1B). Upon stimulation, CTNNB1 also translocates to the nucleus, where CTNNB1 binds  
52 to TCF/LEF transcription factors to regulate target gene transcription as part of a larger

53 transcriptional complex (Behrens et al., 1996; Fiedler et al., 2015; Molenaar et al., 1996; van  
54 Tienen, Mieszczanek, Fiedler, Rutherford, & Bienz, 2017).

55 The working model for WNT/CTNNB1 signaling described above, is the result of almost 40  
56 years of research. The use of traditional genetic and biochemical approaches has allowed  
57 identification of the core players, as well as dissection of the main signaling events. However,  
58 multiple aspects of WNT/CTNNB1 signaling remain poorly understood. For instance the exact  
59 molecular composition and mechanism for inhibition of the destruction complex remain  
60 unclear (reviewed in Tortelote et al., 2017), and how WNT/CTNNB1 signaling regulates the  
61 subcellular distribution of CTNNB1 requires further scrutiny.

62 Most biochemical techniques lead to loss of spatial information and averaging of cell-to-cell  
63 heterogeneity, since proteins are extracted from their cellular context. Additionally, temporal  
64 information is usually limited to intervals of several minutes or hours. Live-cell microscopy  
65 offers better spatiotemporal resolution. However, currently many of these studies are  
66 conducted by overexpressing the protein(s) of interest. This can severely affect activation,  
67 localization and complex formation (T. J. Gibson, Seiler, & Veitia, 2013; Mahen et al., 2014).

68 Although stabilization of CTNNB1 by WNT signaling has been extensively studied, there are  
69 very few studies on the spatiotemporal dynamics of this process especially at the endogenous  
70 level (Chhabra, Liu, Goh, Kong, & Warmflash, 2019; Massey et al., 2019; Rim, Kinney, & Nusse,  
71 2020).

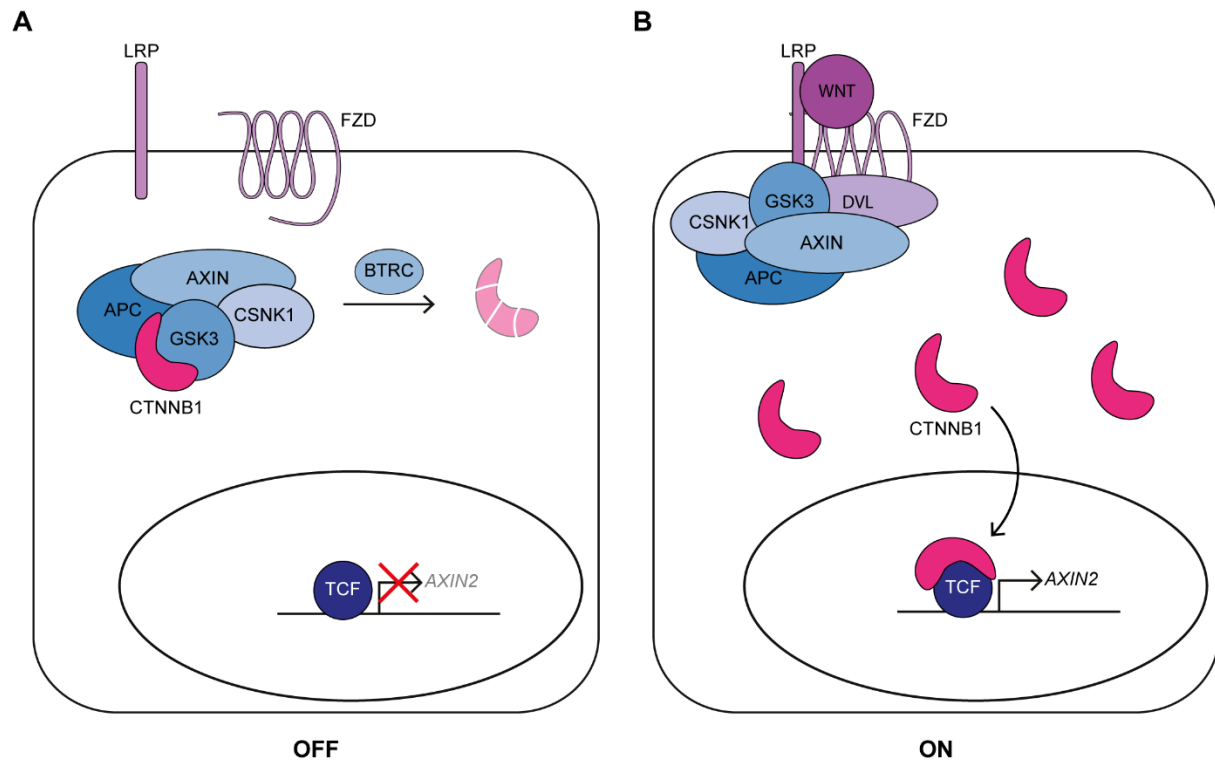

72  
73  
74  
75  
76  
77  
78  
79  
80  
81

**Figure 1:** Current model of the WNT/CTNNB1 pathway. A) In the absence of WNT ligands, free cytoplasmic CTNNB1 is captured by the destruction complex (or “degradosome”) consisting of AXIN, APC, CSNK1 and GSK3, where it is sequentially phosphorylated by the latter two kinases. This phosphorylation triggers ubiquitination by BTRC and subsequent proteasomal degradation. As a result, levels of CTNNB1 are kept low in both the cytoplasm and the nucleus. B) Binding of the WNT protein to the FZD and LRP receptors inhibits the destruction complex. This process is mediated by DVL and is thought to sequester the destruction complex to the membrane (also known as the “signalosome”). CTNNB1 accumulates in the cytoplasm and subsequently translocates to the nucleus, where it promotes the transcription of target genes, such as AXIN2, as a co-activator of TCF/LEF transcription factors. This transcriptional complex contains multiple other partners and is also termed the “enhanceosome”. Note that CTNNB1 also plays a structural role at the membrane in adherens junctions (not depicted).

82

83 Here we use CRISPR/Cas9 mediated genome editing in haploid cells to generate clonal cell  
84 lines that express fluorescently tagged CTNNB1. Using confocal imaging and automated cell  
85 segmentation we quantify the dynamic subcellular increase of endogenous CTNNB1 upon  
86 WNT stimulation. Moreover, using Fluorescence Correlation Spectroscopy (FCS) and Number  
87 and Brightness (N&B) analysis we measure the mobility and concentration of CTNNB1,  
88 providing information on CTNNB1 containing complexes in the cytoplasm and nucleus. Finally,  
89 we use these parameters to construct a novel computational model of WNT/CTNNB1  
90 signaling. Our combined approach offers new insight into the dynamic regulation of CTNNB1  
91 in mammalian cells through modulation of the destruction complex as well as  
92 nucleocytoplasmic shuttling and nuclear retention.

## 93 Results

### 94 Generation of clonal HAP1<sup>SGFP2-CTNNB1</sup> cell lines

95 To be able to visualize and quantify the spatiotemporal dynamics of WNT/CTNNB1 signaling  
96 at the endogenous level, we fluorescently tagged CTNNB1 in mammalian cells using  
97 CRISPR/Cas9 mediated homology directed repair (Ran et al., 2013) (Figure 2). To preserve the  
98 existing (epi)genetic control mechanisms of *CTNNB1* expression, only the coding sequence for  
99 SGFP2, a monomeric, bright and photostable green fluorescent protein (G.-J. Kremers,  
100 Goedhart, van den Heuvel, Gerritsen, & Gadella, 2007), was seamlessly inserted at the  
101 starting ATG of the *CTNNB1* coding sequence in HAP1 cells (Figure 2A, Figure 2 supplement  
102 2A). HAP1 is a near-haploid and WNT responsive cell line (Andersson et al., 1987; Carette et  
103 al., 2011; Kotecki, Reddy, & Cochran, 1999; Lebensohn et al., 2016). By using haploid cells, we  
104 could ensure homozygous tagging of *CTNNB1* (Figure 2B), thus overcoming the limitations of  
105 polyploid cell lines where genome editing often results in a combination of correctly and  
106 incorrectly edited alleles (Canaj et al., 2019).

107 To obtain clonal cell lines with the desired modification, single SGFP2-positive cells were  
108 isolated by FACS sorting (Figure 2C-E). Because HAP1 cells have the tendency to become  
109 diploid or polyploid over time (Essletzbichler et al., 2014; Yaguchi et al., 2018), we used a  
110 gating strategy to specifically select for haploid cells (Figure 2 supplement 1). Genome editing  
111 of wild-type HAP1 (HAP1<sup>WT</sup>) cells with a targeting gRNA and the *SGFP2-CTNNB1* repair  
112 construct resulted in a slight increase in fluorescence for a small population (0.2%) of cells  
113 compared to non-repaired control cells (Figure 2C-D). Treatment of these cells with  
114 CHIR99021, a potent and selective GSK3 inhibitor (Bain et al., 2007), resulted in an increase  
115 of the green fluorescence intensity (Figure 2E), but not the absolute number of positive  
116 events. The responsiveness to CHIR99021 provided a strong indication that these fluorescent

117 events corresponded to HAP1 cells in which the *SGFP2* sequence was successfully knocked  
118 into the endogenous *CTNNB1* locus (HAP1<sup>SGFP2-CTNNB1</sup>).

119 PCR based screening confirmed that 22/23 single-cell sorted clones indeed showed an  
120 integration of the expected size at the *CTNNB1* locus. Complete sequence coverage of the  
121 insertion site in exon 2 was obtained for 9/11 sequenced clones, of which 8 showed the  
122 desired repair, and 1 clone showed an additional point mutation in the repaired locus. Sanger  
123 sequencing results around the *SGFP2* integration site are shown for three correctly targeted  
124 HAP1<sup>SGFP2-CTNNB1</sup> clones from three independent transfections, which were used for further  
125 experiments (Figure 2 supplement 2B-C). Thus, while scarless tagging of endogenous genes in  
126 HAP1 cells is relatively cumbersome (only 0.2% gated events), the desired repair occurs with  
127 almost 90% efficiency within this population.

A

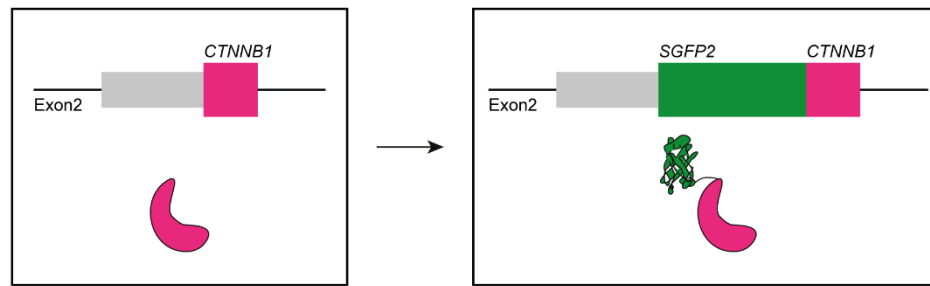

B

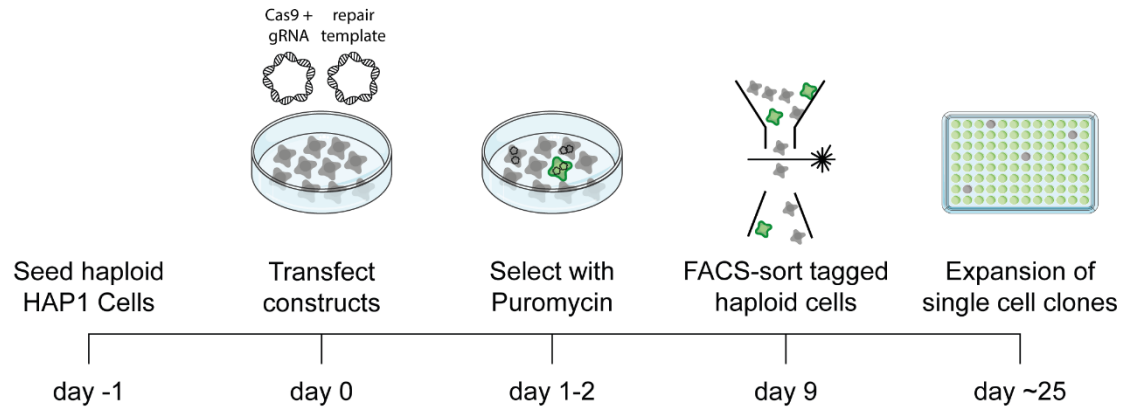

C

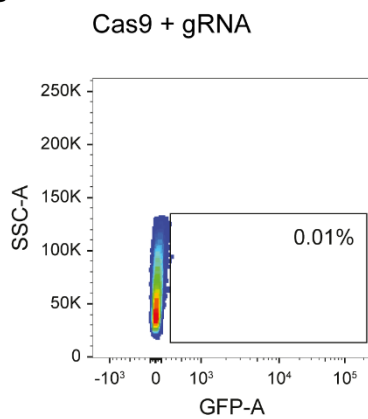

D

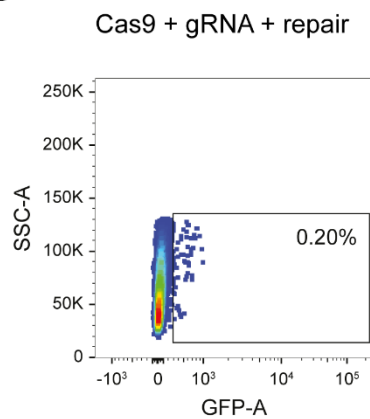

E

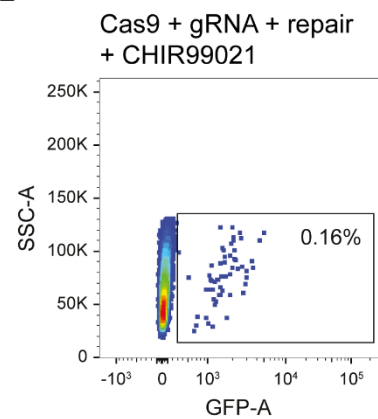

128

129 **Figure2:** Generation of  $HAP1^{SGFP2-CTNNB1}$  cell lines. A) Cartoon depicting exon 2 of the *CTNNB1* locus, which contains the start codon, and the  
 130 *CTNNB1* protein before (left) and after (right) introduction of the SGFP2 by CRISPR/Cas9 mediated homology directed repair. B) Schematic  
 131 of the experimental workflow and timeline for generating  $HAP1^{SGFP2-CTNNB1}$  clones. Cas9, gRNA and repair templates are transfected as  
 132 plasmids. The repair template contains the coding sequence of SGFP2 surrounded by 800 bp homology arms on either side and lacks the  
 133 gRNA recognition site (see supplement 2 of this figure). A short puromycin selection step is included from 24-48 hours after transfection to  
 134 enrich for transfected cells. Haploid, GFP-positive cells are sorted and single cell clones are expanded for further analysis. C-E) FACS plots  
 135 illustrating control (C) and SGFP2-CTNNB1 tagged cells (D-E). C) Cells transfected with Cas9 and gRNA in the absence of a repair template  
 136 were used to set the gate for SGFP2-positive events. D) A small population of cells expressing low levels of SGFP2 can be detected when  
 137 cells are transfected with Cas9, gRNA and repair template. E) Treatment of cells similar to those depicted in (D) with  $8\mu M$  CHIR99021 does  
 138 not change the amount of cells that are SGFP2 positive, but increases the SFP2 signal, most likely reflecting an increase in SGFP2-tagged  
 139 beta catenin levels on a per cell basis and supporting the notion that the gated events indeed represent successfully tagged cells.

140



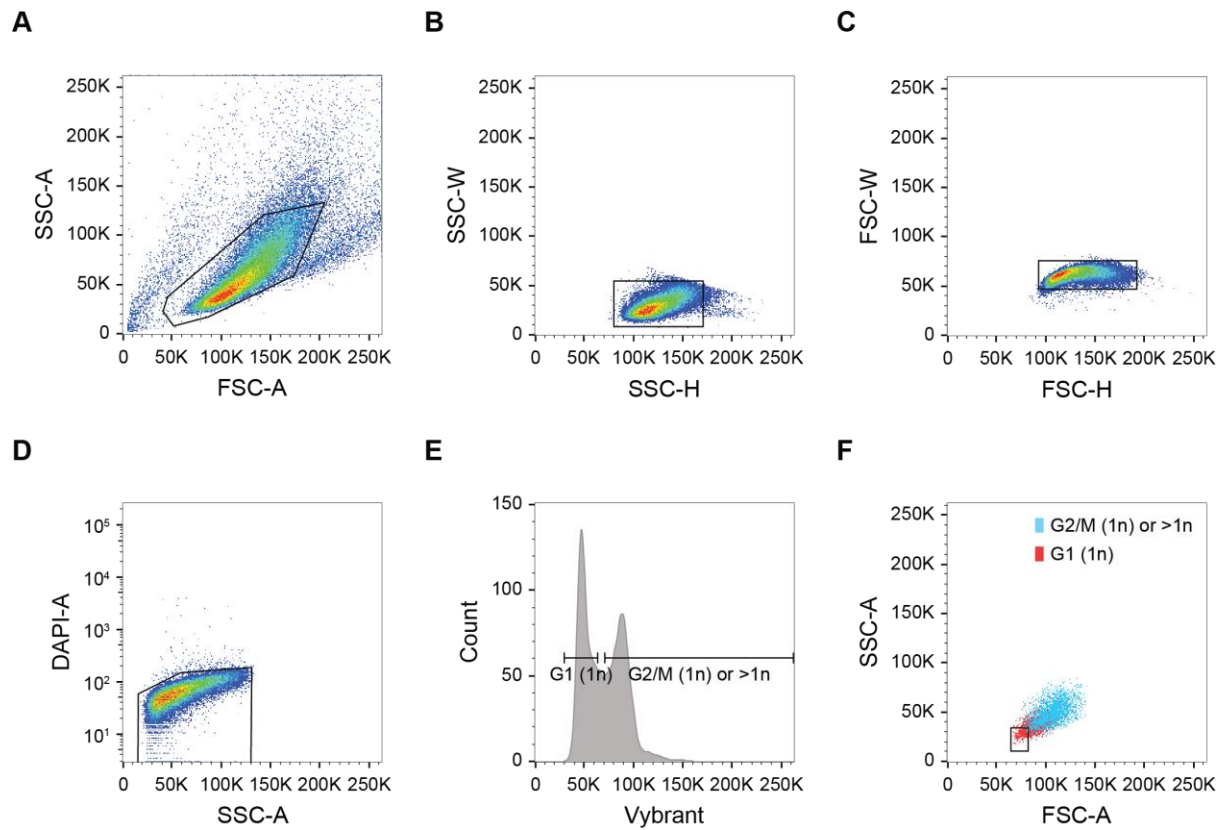

141

142

143

144

145

146

**Figure 2 – supplement 1:** FACS Gating strategy for haploid HAP1 cells. A-C) Single-cell gating based on forward scatter (FSC) and side scatter (SSC). D) Live cell gating based on DAPI exclusion. E-F) Haploid cell sorting based on Vibrant live-cell DNA dye. E) Haploid cell cycle profile. Only cells in G1 can be confidently identified as haploid (1n). The second peak contains both G2/M haploid cells, as well as diploid (2n) and polyploid events. Of note, the depicted HAP1<sup>WT</sup> population is mainly haploid. F) Back-gating of the haploid G1 population from E onto the forward and side scatter plot. A stringent gate is set based on cell size to ensure only G1 (1n) cells qualify for sorting.

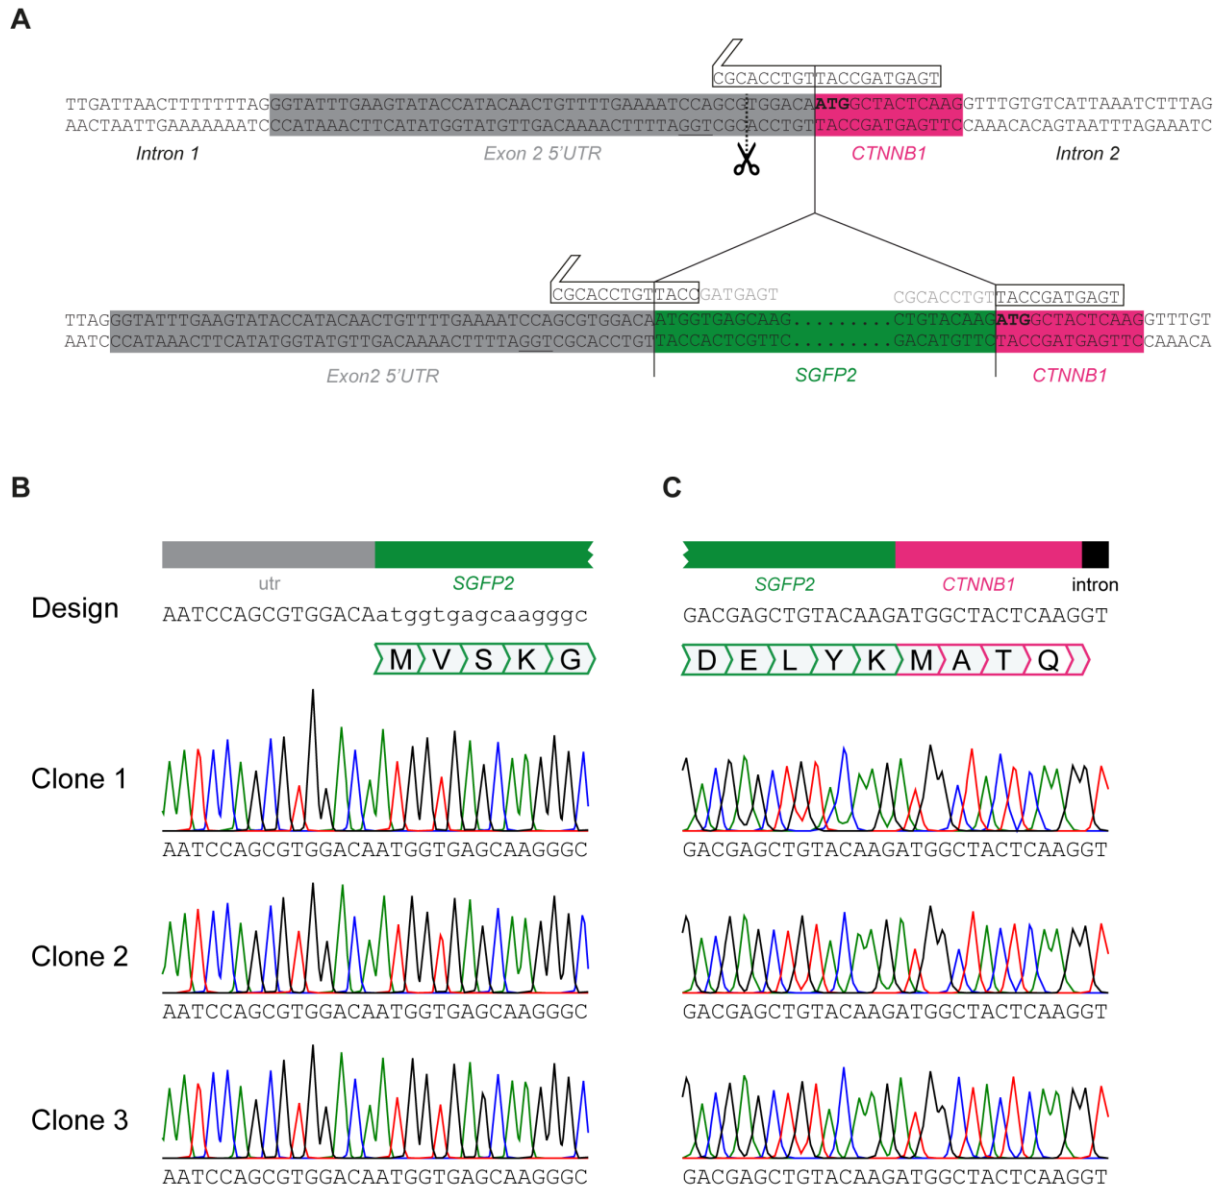

147

148 **Figure 2 – supplement 2: SGFP2-CTNNB1 locus** A) Detailed view of *CTNNB1* exon 2 depicting gRNA design relative to the wildtype (top) and  
 149 repaired (bottom) *CTNNB1* allele. Note that the repair template contains the same sequence as the repaired allele depicted here. *CTNNB1*  
 150 sequences are shown in capital letters, *SGFP2* sequences shown in lowercase. 5' UTR, *SGFP2* and *CTNNB1* and intron regions are indicated  
 151 below the colored boxes. The gRNA (white arrow box above sequence) overlaps the start codon (depicted in bold), resulting in a Cas9-  
 152 mediated double-strand break in the 5'UTR (predicted cut site indicated by dotted line and scissors, PAM site underlined). After successful  
 153 homologous recombination, most of the gRNA binding site is destroyed, thus minimizing the chance of cutting the repair template or re-  
 154 cutting the repaired allele. B-C) Sequencing of three independent HAP1<sup>SGFP2-CTNNB1</sup> clones on the 5' (B) and the 3' (C) end of *SGFP2* integration  
 155 in exon 2 of *CTNNB1*. Sanger sequencing of the endogenous *CTNNB1* locus of clone 1, clone 2 and clone 3 shows an exact match to the  
 156 design and thus correct homology directed repair.

157

158 Functional validation of the HAP1<sup>SGFP2-CTNNB1</sup> knock-in allele

159 To verify that the SGFP2 tag did not interfere with CTNNB1 function, three clonal  
160 HAP1<sup>SGFP2-CTNNB1</sup> cell lines were further characterized using established experimental readouts  
161 for WNT/CTNNB1 signaling (Figure 3 and Figure 3 supplement). Western blot analysis  
162 confirmed that the HAP1<sup>SGFP2-CTNNB1</sup> clones did not contain any untagged CTNNB1 but only  
163 expressed the fusion protein, which ran at the expected height (~27 kDa above the wild-type  
164 CTNNB1, Figure 3A). Moreover, in response to CHIR99021 treatment the total levels of SGFP2-  
165 CTNNB1 in tagged cell lines increased to the same extent as wild-type CTNNB1 in untagged  
166 cells, as detected with both CTNNB1 and GFP antibodies (Figure 3A-B). To examine if SGFP2-  
167 CTNNB1 was able to promote TCF/LEF transcriptional activity, we measured the induction of  
168 the TCF/LEF-responsive MegaTopflash luciferase reporter (Hu et al., 2007). Stimulation of the  
169 WNT/CTNNB1 pathway with CHIR99021 resulted in a similar range of reporter gene activation  
170 in the three tagged clones and parental HAP1 cells (Figure 3C). Induction of the universal  
171 WNT/CTNNB1 target gene *AXIN2* (Lustig et al., 2002) was also comparable across wildtype  
172 and tagged cells (Figure 3D). Finally, we visualized the subcellular accumulation of SGFP2-  
173 CTNNB1 accumulation after WNT/CTNNB1 pathway activation. While untreated cells mainly  
174 show membrane localization of CTNNB1, treatment with purified WNT3A protein (Figure 3E)  
175 and CHIR99021 (Figure 3 supplement 1E) increased SGFP2-CTNNB1 levels in the cytoplasmic  
176 and nucleus.

177 Taken together, WNT-responsive changes in CTNNB1 levels and localization and activity are  
178 preserved after CRISPR/Cas9 mediated homozygous tagging of CTNNB1. Although there is  
179 some variation between the three clones with respect to CTNNB1 stabilization and target  
180 gene activation, this is likely due to the sub-cloning of these cell lines rather than the targeting

181 per se. Based on the combined characterization results, we selected clone 2 for more  
 182 extensive functional imaging experiments and analyses.

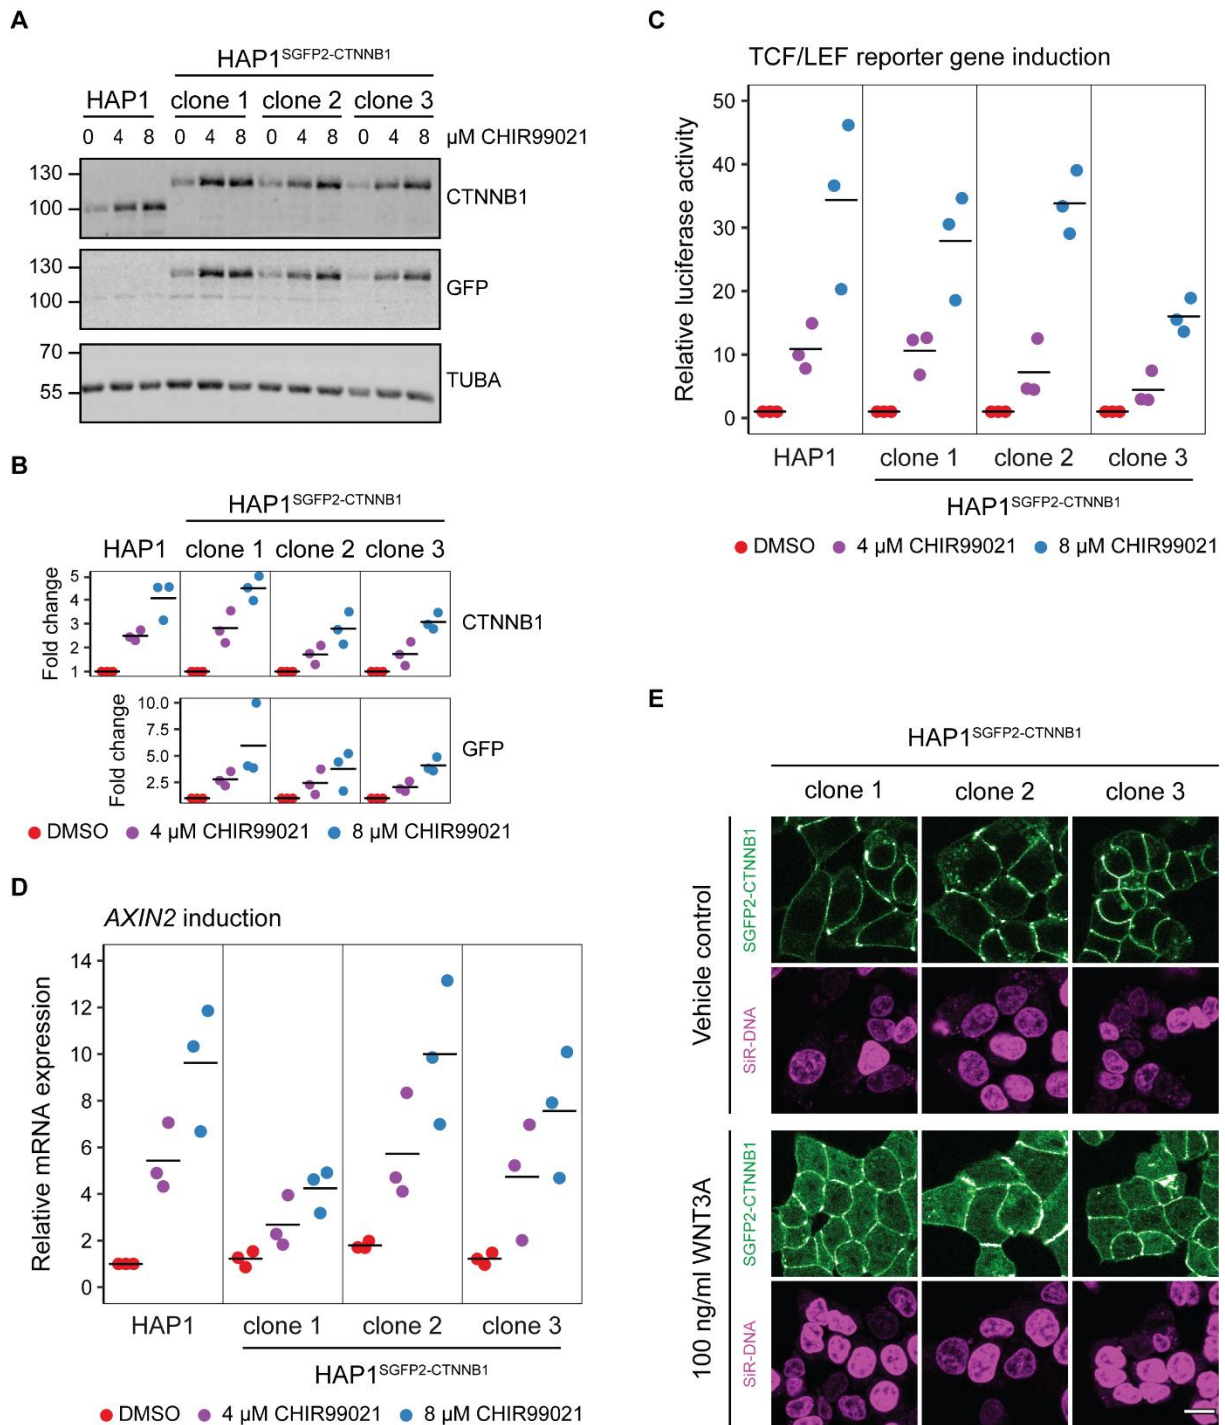

183

184 **Figure3:** Functional validation of three independent HAP1<sup>SGFP2-CTNNB1</sup> clones. A) Western blot, showing CTNNB1 (HAP1<sup>WT</sup>) and SGFP2-CTNNB1  
 185 (HAP1<sup>SGFP2-CTNNB1</sup> clone 1, 2 and 3) accumulation in response to CHIR99021 treatment. All panels are from one blot that was cut at the 70 kDa  
 186 mark and was stained with secondary antibodies with different fluorophores for detection. Top: HAP1<sup>WT</sup> cells express CTNNB1 at the  
 187 expected wild-type size. Each of the three clonal HAP1<sup>SGFP2-CTNNB1</sup> cell lines only express the larger, SGFP2-tagged form of CTNNB1. Middle:  
 188 Only the tagged clones express the SGFP2-CTNNB1 fusion protein, as detected with an anti-GFP antibody at the same height. Bottom: alpha-  
 189 Tubulin (TUBA) loading control. A representative image of n=3 independent experiments is shown. B) Quantification of Western blots from  
 190 n=3 independent experiments, including the one in (A), confirming that the accumulation of CTNNB1 in response to WNT/CTNNB1 pathway

191 activation is comparable between HAP1<sup>WT</sup> and HAP1<sup>SGFP2-CTNNB1</sup> cells. Horizontal bar indicates the mean. C) Graph depicting the results from  
 192 a MegaTopflash dual luciferase reporter assay, showing comparable levels of TCF/LEF reporter gene activation for HAP1<sup>WT</sup> and HAP1<sup>SGFP2-  
 193 CTNNB1</sup> cells in response to CHIR99021 treatment. Data points from n=3 independent experiments are shown. Horizontal bar indicates the  
 194 mean. Values are depicted relative to the DMSO control, which was set to 1 for each individual cell line. D) Graph depicting *AXIN2* mRNA  
 195 induction in response to CHIR99021 treatment, demonstrating that induced expression of an endogenous target gene is comparable  
 196 between HAP1<sup>WT</sup> and HAP1<sup>SGFP2-CTNNB1</sup> cells. Data points represent n=3 independent experiments. Horizontal bar represents the mean. *HPRT*  
 197 was used as a reference gene. Values are depicted relative to the HAP1<sup>WT</sup> DMSO control, which was set to 1. E) Representative confocal  
 198 microscopy images of the three HAP1<sup>SGFP2-CTNNB1</sup> clones after 4-hour vehicle control or 100ng/ml WNT3A treatment, revealing intracellular  
 199 accumulation of SGFP2-CTNNB1 (green). Nuclei were counterstained with SiR-DNA dye (magenta). Scale bar is 10µm.

200

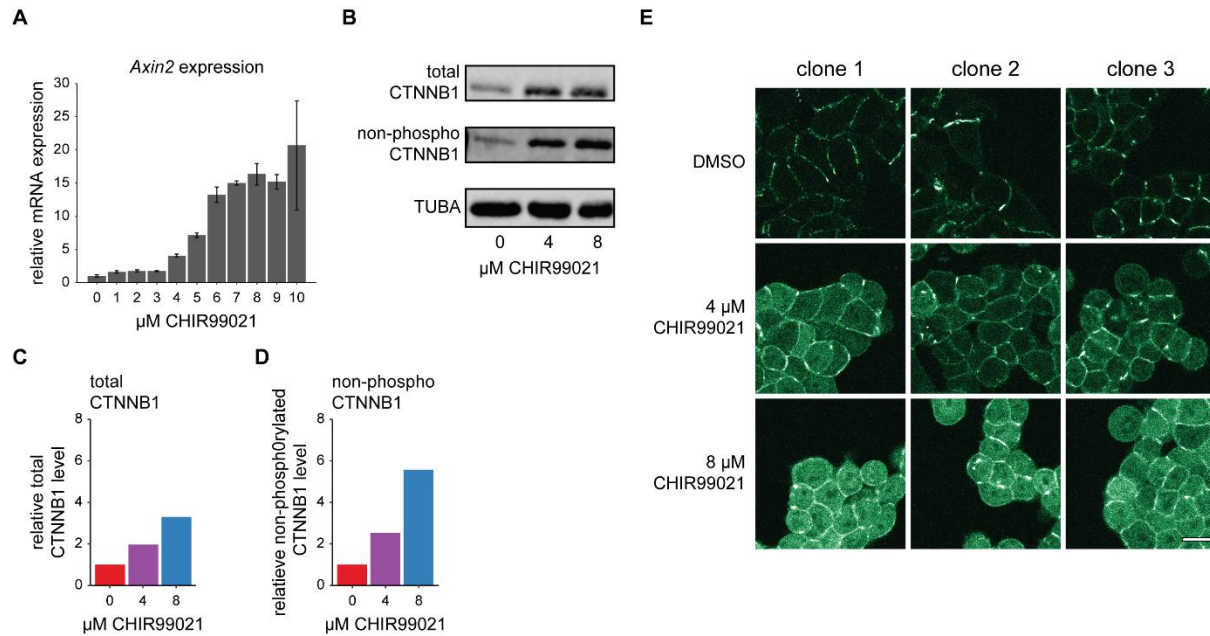

201

202 **Figure 3 supplement 1:** Verification of the WNT/CTNNB1 responsiveness of HAP1 cells. A) Graph depicting *AXIN2* qRT-PCR results from  
 203 HAP1<sup>WT</sup> cells treated with the indicated range of CHIR99021 (1-10 µM) or DMSO vehicle control (0 µM) for 24 hours. *HPRT* was used as a  
 204 reference gene. Error bars represent standard deviation within technical triplicates from n=1 biological experiment. Based on this, we  
 205 selected 4µM and 8 µM as intermediate and high levels of WNT/CTNNB1 pathway induction for follow up experiments. B) Western blot,  
 206 showing the increase in total (top) and non-phosphorylated (i.e. active) CTNNB1 levels (middle) in response to pathway stimulation. HAP1<sup>WT</sup>  
 207 cells were treated for 24 hours with 4 or 8 µM CHIR99021, or DMSO vehicle control (0 µM). Alpha-Tubulin (TUBA, bottom) serves as a loading  
 208 control. C-D) Quantification of the western blot from (B) depicting the relative fold change of total CTNNB1 (C) or non-phosphorylated  
 209 CTNNB1 (D) to DMSO control corrected for Tubulin loading. E) Representative confocal microscopy images of three independent HAP1<sup>SGFP2-  
 210 CTNNB1</sup> clones, treated for 24 hours with 4 or 8 µM CHIR99021, or DMSO vehicle control. Scalebar is 10 µm.

211

## 212 Live imaging of endogenous SGFP2-CTNNB1 during WNT pathway activation

213 To better understand the temporal dynamics of endogenous CTNNB1 stabilization, we  
214 performed live-cell imaging over 12 hours in HAP1<sup>SGFP2-CTNNB1</sup> cells (Figure 4, Supplementary  
215 Movie 1-3) with different levels of WNT stimulation. Unstimulated cells showed stable  
216 CTNNB1 localization at the cell membrane throughout the imaging time course (Figure 4A,  
217 Supplementary Movie 1). The membrane localization of CTNNB1 is consistent with its  
218 structural role in adherens junctions (Valenta, Hausmann, & Basler, 2012; Yap, Brieher, &  
219 Gumbiner, 1997), which we will not consider further in the current study. Both WNT3A and  
220 CHIR99021 treatment resulted in a heterogeneous response pattern, with some cells in the  
221 population showing a far more prominent increase in CTNNB1 levels in the cytoplasm and  
222 nucleus than others (Figure 4A, Supplementary Movie 2-3).

223 To quantify these dynamic changes, we developed a custom-built automated segmentation  
224 pipeline in CellProfiler™ (Figure 4B). Quantification showed that the dynamics of CTNNB1  
225 accumulation were independent of the dose of WNT3A (Figure 4 C-D, Supplementary Movies  
226 4-5). Treatment with 100 ng/ml WNT3A increased SGFP2-CTNNB1 fluorescence 1.74-fold  
227 (mean, 95% CI 1.73-1.76) in the cytoplasm and 3.00-fold (mean, 95% CI 2.97-3.03) in the  
228 nucleus, with similar results in the other two HAP1<sup>SGFP2-CTNNB1</sup> clones (Figure 4 supplement 1).  
229 Treatment with 4 μM of CHIR99021 yielded similar kinetics as WNT3A treatment (Figure 4C-  
230 D). Treatment with WNT3A and 4 μM CHIR both also resulted in a decrease of SGFP2-CTNNB1  
231 levels toward the end of the time series. However, at the highest levels of GSK3 inhibition (8  
232 μM CHIR99021), no plateau was reached and the levels of SGFP2-CTNNB1 continued to  
233 increase throughout the imaging time course. The fact that intracellular SGFP2-CTNNB1 levels  
234 in the 8 μM CHIR99021 condition continued to accumulate, suggests that negative feedback,

235 for example through *AXIN2* (Lustig et al., 2002), is overridden under these circumstances. Of  
236 note, the quantification also confirms that there is cell to cell heterogeneity in the response,  
237 regardless of whether WNT/CTNNB1 signaling is activated at the level of the receptor (WNT3A  
238 treatment) or at the level of the destruction complex (CHIR99021 treatment), as can be seen  
239 from the spread of intensities measured from individual cells (Figure 4 Supplement 2A-B).

240 Our quantification shows that, nuclear accumulation of CTNNB1 is favored over cytoplasmic  
241 increase (compare the slopes in Figure 4C-D). Moreover, the first significant increases in  
242 fluorescence intensity in the cytoplasm could be detected after ~45 minutes of treatment  
243 (Supplementary Movie 4, Figure 4 supplement 2C), whereas in the nucleus an increase was  
244 first after ~30 minutes (Supplementary Movie 5, Figure 4 supplement 2D). To examine the  
245 relation between the cytoplasmic and nuclear CTNNB1 pools more closely, we calculated the  
246 ratio between nuclear and cytoplasmic intensities of SGFP2-CTNNB1 (Figure 4E,  
247 Supplementary Movie 6). In untreated cells the nuclear/cytoplasmic ratio was 0.652 (mean,  
248 95% CI 0.649-0.657), showing that SGFP2-CTNNB1 was preferentially localized to the  
249 cytoplasm (Figure 4E). For the first 3 hours after WNT3A and CHIR99021 addition, nuclear  
250 CTNNB1 levels rose considerably faster than cytoplasmic CTNNB1 levels until the  
251 nuclear/cytoplasmic ratio showed a slight nuclear enrichment of 1.08 (mean [3-5 hours] 95%  
252 CI 1.07-1.10) for 100 ng/ml WNT3A and 1.29 (mean [3-5 hours], 95% CI 1.26-1.32) for 8 $\mu$ M  
253 CHIR99021. This indicates that not only the turn-over, but also the subcellular localization of  
254 CTNNB1 is actively regulated both before and after WNT pathway activation.

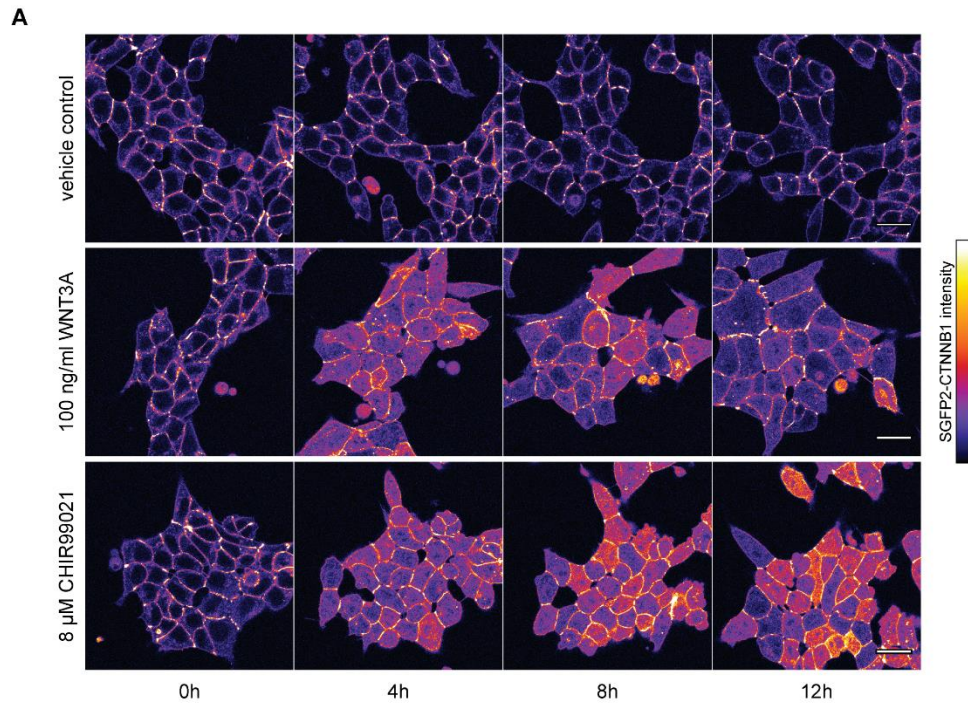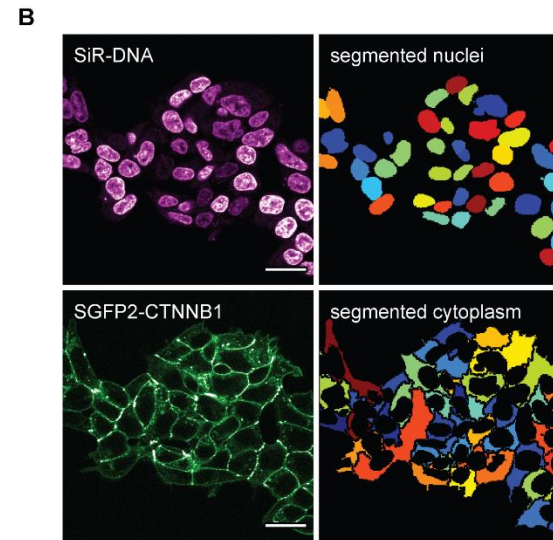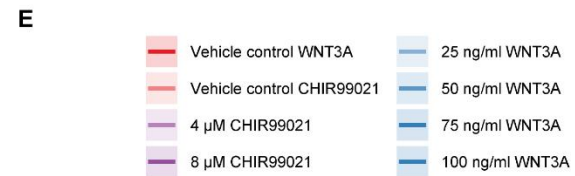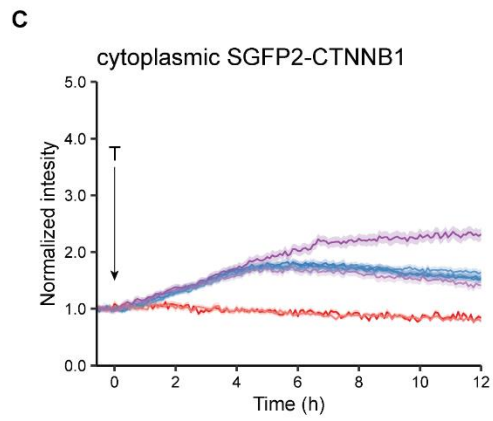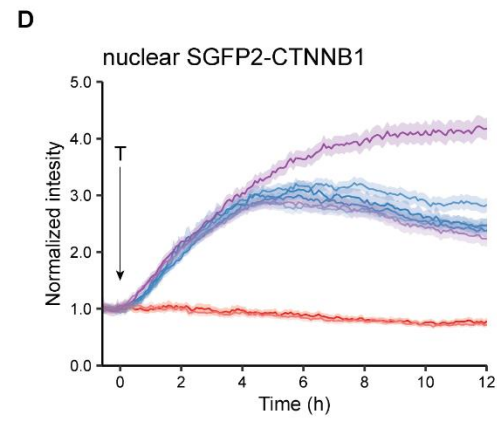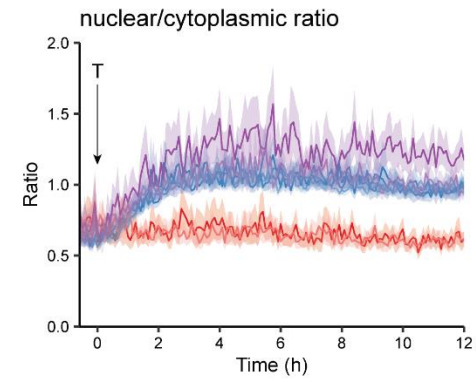



256 **Figure 4:** Live imaging of HAP1<sup>SGFP2-CTNNB1</sup>. A) Representative stills from confocal time-lapse experiments corresponding to Supplementary  
257 Movies 1-3, showing an increase of SGFP2-CTNNB1 after treatment with 100 ng/ml WNT3A (middle) and 8 $\mu$ M CHIR99021 (bottom) relative  
258 to a vehicle control (BSA) treated sample (top). Scale bar = 20  $\mu$ m. B) Segmentation of nuclei (top) and cytoplasm (bottom) based in the SiR-  
259 DNA signal and SGFP2-CTNNB1 signal. Scale bar = 20 $\mu$ m. C-E) Quantification of time-lapse microscopy series, using the segmentation pipeline  
260 shown in (B). Arrow indicates the moment of starting the different treatments (T, see legend in E for details). C-D) Graph depicting the  
261 normalized intensity of SGFP2-CTNNB1 in the cytoplasm (C) or nucleus (D) over time. Solid lines represent the mean normalized fluorescence  
262 intensity and shading indicates the 95% confidence interval. n=155-400 cells for each condition and time point, pooled data from n=3  
263 independent biological experiments. E) Graph depicting the nuclear/cytoplasmic ratio of SGFP2-CTNNB1 over time, calculated from raw  
264 intensity values underlying (C) and (D).

265

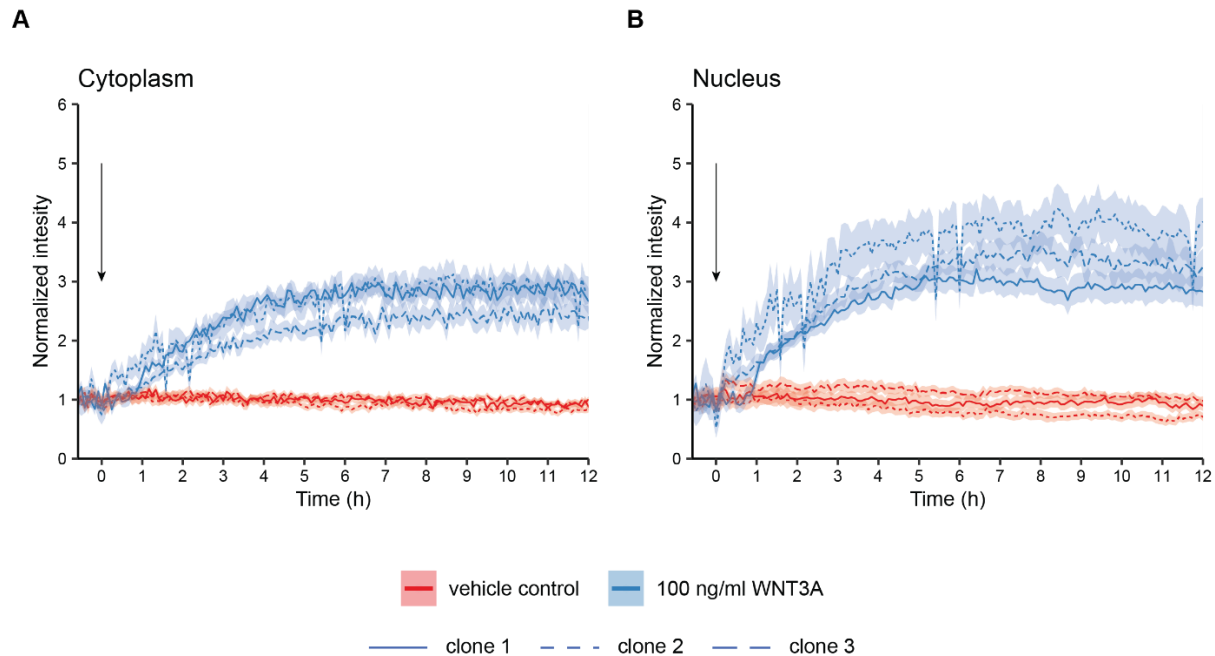

266

267 **Figure 4 supplement 1:** Graphs showing quantification of time-lapse microscopy experiments with three independent HAP1<sup>SGFP2-CTNNB1</sup> clones.  
268 Stills of this experiment are shown in Figure 3C. Segmentation was performed as described in Figure 4. Arrow indicates the moment of  
269 starting the different treatments (BSA in red or 100 ng/ml WNT3A in blue). Solid lines represent the mean normalized intensity and shading  
270 the 95% confidence interval in the cytoplasm (A) or nucleus (B). Line pattern indicates the three different clones. n=13-158 cells for each  
271 condition and time point for n=1 biological experiment.

272

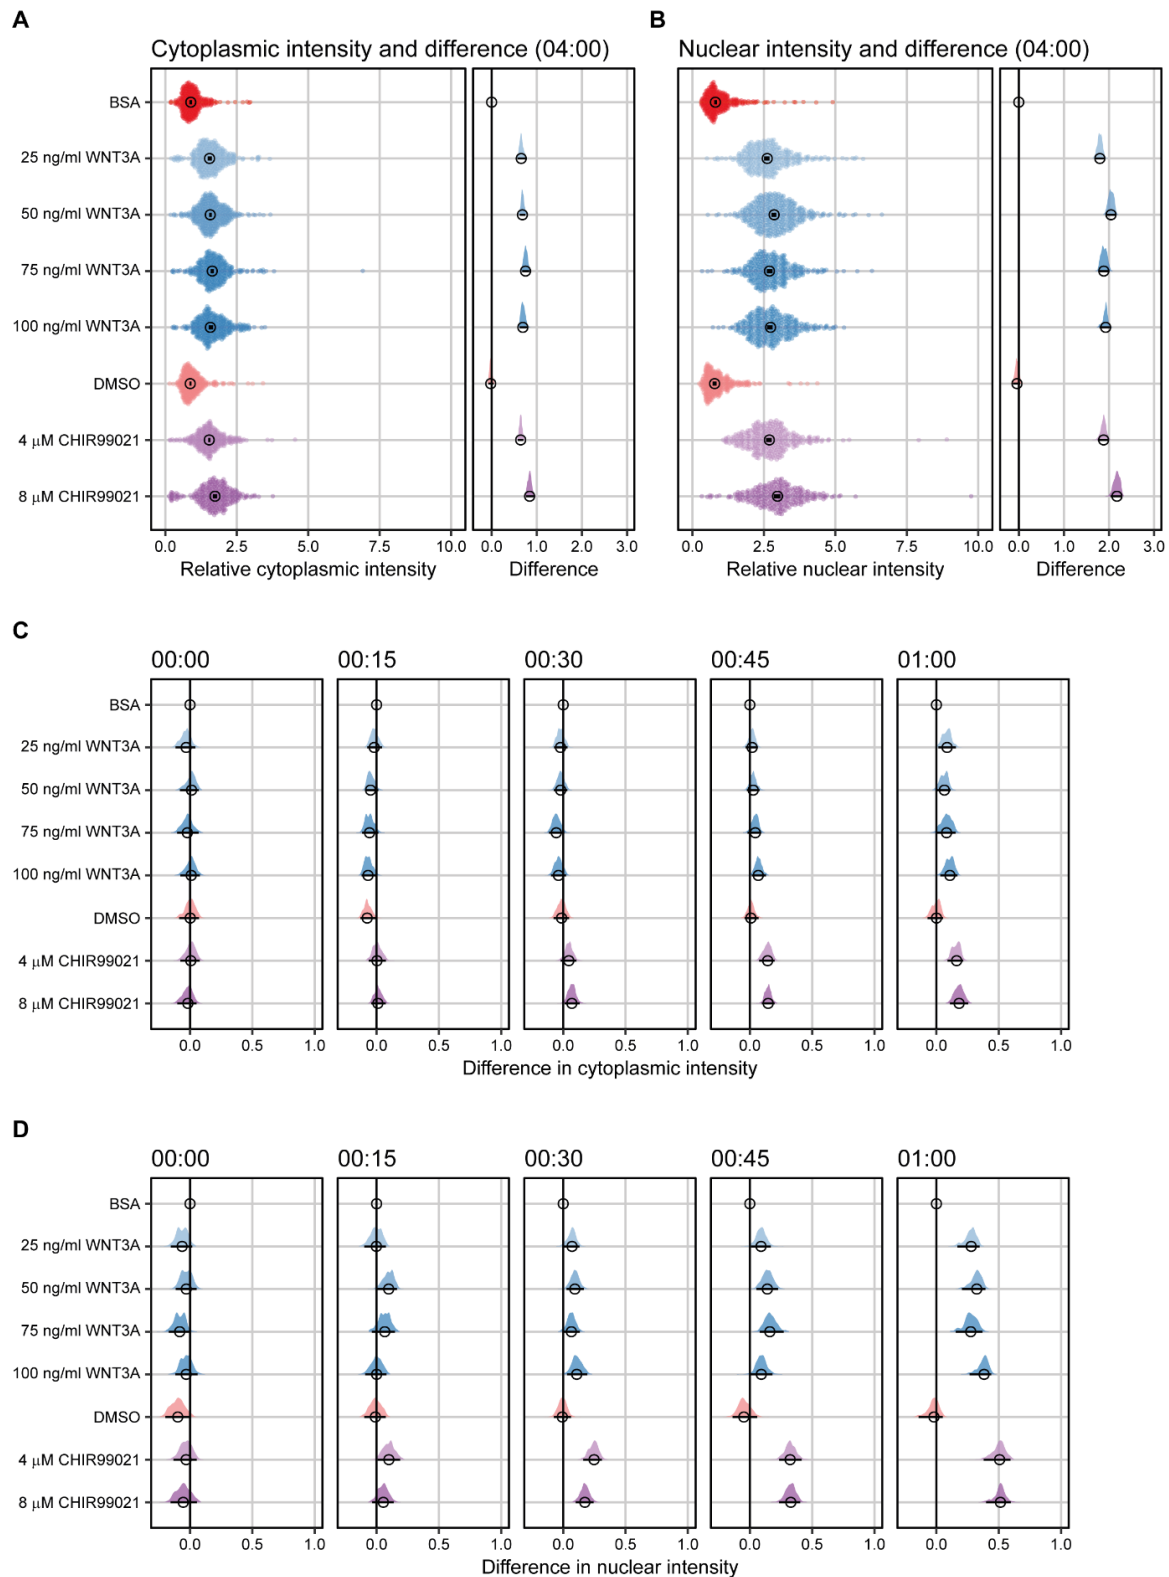

273

274 **Figure 4 supplement 2 A-B** Plots depicting the relative intensity (left) and the difference in relative intensity to BSA treated cells (right) in  
275 the cytoplasm (A) and nucleus (B) after 4 hours of treatment. Circles indicate the median value and bars indicate the 95% CI. In the relative  
276 intensity plot (left) the distribution is built from individual data points in a violin-type fashion to faithfully represent the distribution of data.  
277 In the difference plot (right) the distribution of differences is represented in a half violin plot. If the 95% CI in the difference plot does not  
278 overlap the zero line, which indicates no difference, the sample is significantly different from BSA control condition. C-D) Plots depicting the  
279 difference in relative intensity in the cytoplasm (C) and nucleus (D) between the moment of addition and 1 hour of treatment. Titles indicate  
280 the time (hh:mm). The distribution of differences is represented in a half violin plot. Circles indicate the median value and bars indicate the  
281 95% CI. If the 95% CI does not overlap the zero line, which indicates no difference, the sample is significantly different from the BSA control  
282 condition.

283 Establishing a fitting model for SGFP2-CTNNB1 diffusion

284 Having measured the relative changes in the cytoplasmic and nuclear levels of CTNNB1 in  
285 response to WNT pathway activation, we next sought to exploit our experimental system to  
286 quantify additional molecular properties of CTNNB1 in each of these subcellular  
287 compartments using Fluorescence Correlation Spectroscopy (FCS). FCS is a powerful method  
288 to measure the mobility and absolute levels of fluorescent particles in a nanomolar range,  
289 compatible with typical levels of signaling proteins in a cell (reviewed in Hink, 2014). It has for  
290 instance been used to gain insight into the assembly of DVL3 supramolecular complexes  
291 (Yokoyama, Markova, Wang, & Malbon, 2012), the endogenous concentrations and mobility  
292 of nuclear complexes (Holzmann et al., 2019; Lam et al., 2012), and most recently, to quantify  
293 ligand-receptor binding reactions in the WNT pathway (Eckert et al., 2020). In point FCS, the  
294 fluorescence intensity is measured in a single point (Figure 5 A, D-E). Diffusion of a labeled  
295 particle, in this case SGFP2-CTNNB1, causes fluctuation of the fluorescence signal over time  
296 (Figure 5B). By correlating the fluorescence intensity signal to itself over increasing time-  
297 intervals, an autocorrelation curve is generated (Figure 5C). To extract relevant biophysical  
298 parameters, such as mobility (a measure for size) and the absolute numbers of the fluorescent  
299 particles, this autocorrelation curve is fitted with an appropriate model.

300 We first attempted to fit the autocorrelation curves obtained with point FCS measurements  
301 of HAP1<sup>SGFP2-CTNNB1</sup> cells, with a model containing one single diffusion speed for SGFP2-  
302 CTNNB1. This model was unable to fit most of our data (Figure 5F). The current literature  
303 suggests that while a large portion of CTNNB1 is present as a monomer (Gottardi & Gumbiner,  
304 2004; Maher, Mo, Flozak, Peled, & Gottardi, 2010), CTNNB1 is also present in multiprotein  
305 complexes in the cytoplasm and in the nucleus (reviewed in Gammons and Bienz, 2018).

306 Therefore, we next used a model with two diffusion components, in which the first diffusion  
307 component was fixed to the diffusion speed of monomeric, unbound SGFP2-CTNNB1 (14.9  
308  $\mu\text{m}^2/\text{s}$ ) and the second diffusion component was limited to slower speeds compatible with  
309 point-FCS imaging (see materials and methods for details). This model fitted well with our  
310 autocorrelation curves as obtained in both cytoplasmic and nuclear point FCS measurements  
311 (Figure 5G), consistent with the presence of free monomeric CTNNB1 and larger CTNNB1  
312 containing complexes in both the nucleus and cytoplasm.

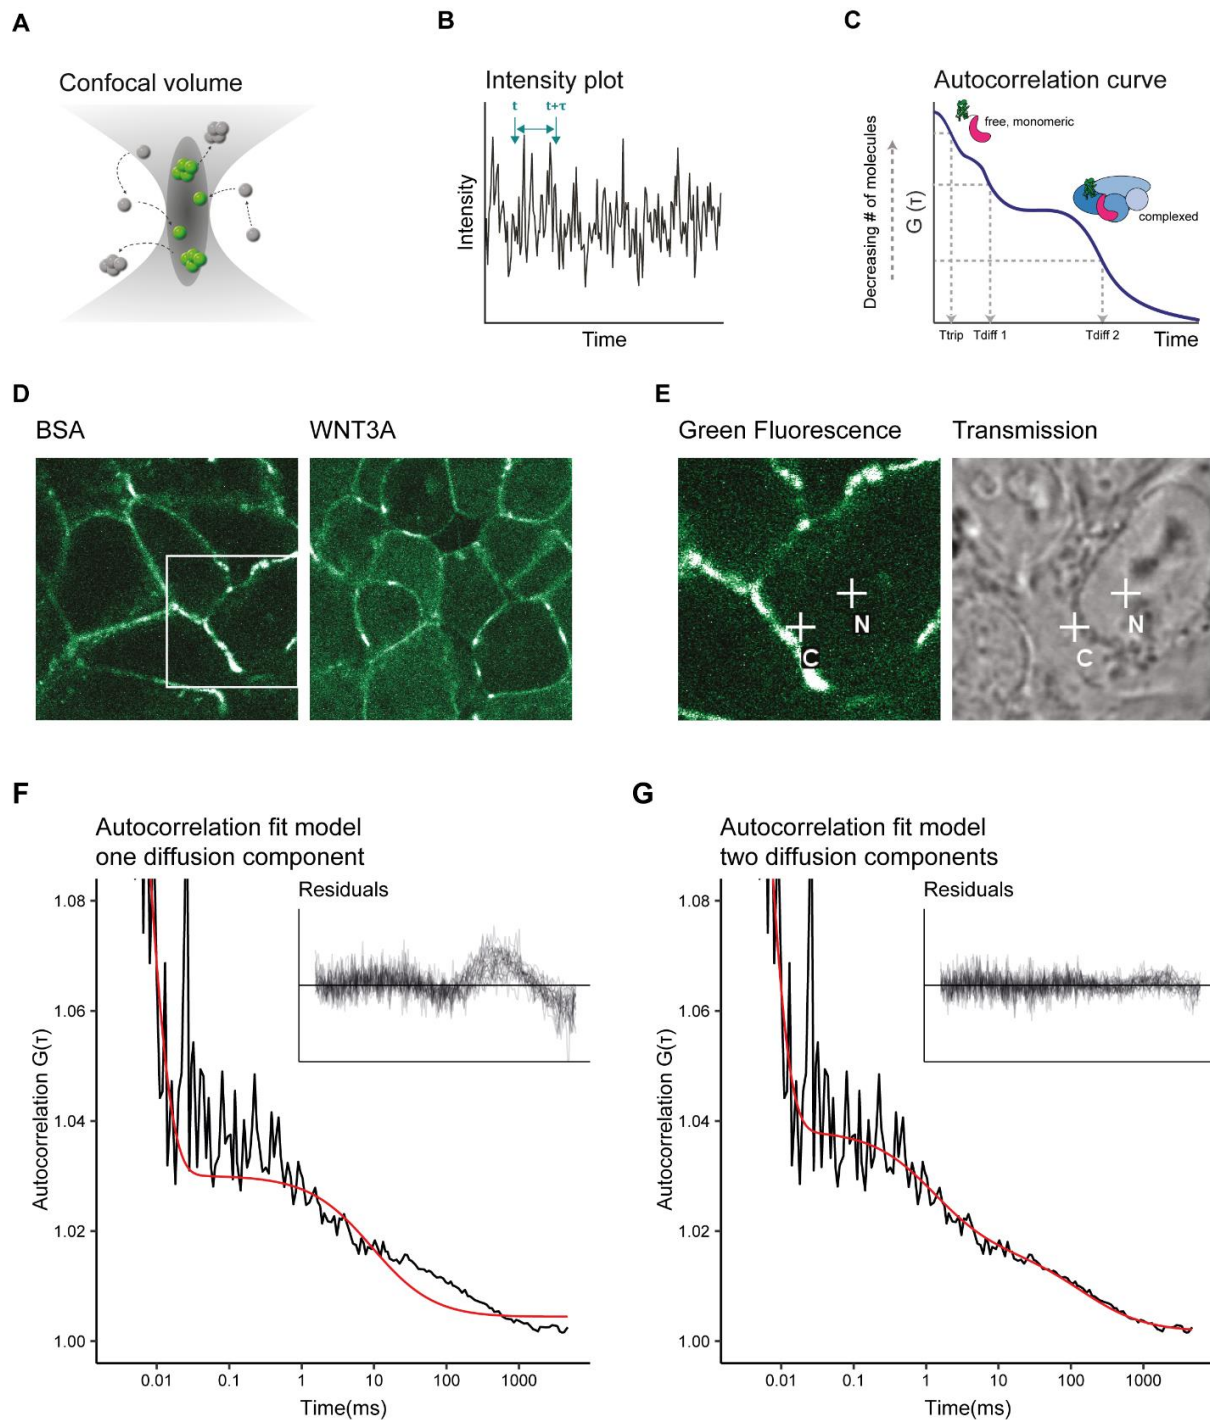

313

314 **Figure 5:** Two diffusion-component fit-model for SGFP2-CTNNB1 FCS measurements. A) Schematic representation of the point FCS  
 315 technique, depicting the confocal volume with fluorescent particles diffusing in and out. Particles in FCS are defined by their coherent  
 316 movement; therefore, a particle can be made up of monomers or multimers in isolation or complexed to unlabeled molecules. B) Schematic  
 317 representation of intensity fluctuations over time as measured in the confocal volume. Fluctuations are the result of both photo-physics  
 318 (e.g. blinking of the fluorophore) and diffusion. C) Graphical representation of the two diffusion-component fitting model used for our  
 319 autocorrelation curves.  $T_{trip}$  describes the blinking of the SGFP2 fluorophore and the after-pulsing artefact.  $T_{diff1}$  and  $T_{diff2}$  describe the  
 320 monomeric and complexed form of SGFP2-CTNNB1, respectively. Details of all fitting parameters are described in Materials and Methods.  
 321 D) Representative confocal images of HAP1<sup>SGFP2-CTNNB1</sup> cells treated for 4 hours with BSA (left) or 100 ng/ml WNT3A (right). E) Zoom in of the  
 322 white rectangle in (D), with representative locations of FCS measurement points for cytoplasm (C) and nucleus (N) indicated with white  
 323 crosses in the SGFP2-CTNNB1 channel and transmission channel. F-G) Fitting of a representative autocorrelation curve with one unfixed  
 324 diffusion-component (F) or a two diffusion-component model (G), where the first diffusion component was fixed to the speed of free  
 325 monomeric SGFP2-CTNNB1 ( $14.9\mu\text{m}^2/\text{s}$ ) and the second diffusion component was unfixed. The black line represents the autocorrelation  
 326 curve generated from the FCS measurement, the red line represents the fitted model. The residuals after fitting of 25 individual curves  
 327 are shown in the upper right corner of the graphs.

### 328 Quantification of SGFP2-CTNNB1 mobility in the nucleus

329 By fitting our data with this two-component diffusion model, we obtained the diffusion  
330 coefficient for the slower (i.e. complexed) CTNNB1 fraction in both the nuclear and  
331 cytoplasmic compartment. In the nucleus this second diffusion coefficient was  $0.140 \mu\text{m}^2\text{s}^{-1}$   
332 (median, 95%CI 0.121-0.213) in unstimulated cells and  $0.178 \mu\text{m}^2\text{s}^{-1}$ , (median, 95%CI 0.139-  
333 0.211) in cells treated with purified WNT3A (Figure 6A). This is comparable to the diffusion  
334 coefficients measured for other chromatin bound transcriptional activators (Lam et al., 2012),  
335 which could imply that this pool of SGFP2-CTNNB1 is linked to the chromatin as part of the  
336 TCF transcriptional complex (also called the “enhanceosome”). The fraction of SGFP2-CTNNB1  
337 molecules bound to this nuclear complex increases from 0.26 (median, 95% CI 0.40-0.42) to  
338 0.32 (median, 95%CI 0.30-0.35) upon WNT3A treatment (Figure 6B). This suggests that even  
339 in the absence of WNT3A a fraction of CTNNB1 might already be associated with the DNA and  
340 that WNT3A further stimulates the chromatin binding of CTNNB1, most likely through the TCF  
341 transcriptional complex.

### 342 Quantification of SGFP2-CTNNB1 mobility in the cytoplasm

343 In the cytoplasm, we determined the second diffusion coefficient of SGFP2-CTNNB1 to be  
344  $0.134 \mu\text{m}^2\text{s}^{-1}$  (median, 95% CI 0.124-0.196) in the absence of WNT3A stimulation (Figure 6A).  
345 This is indicative of very large complexes containing SGFP2-CTNNB1 that move with diffusion  
346 kinetics comparable to those previously observed for the 26S proteasome (C. G. Pack et al.,  
347 2014). After WNT3A treatment, the speed of the cytoplasmic complex increased 3.4-fold to  
348  $0.461 \mu\text{m}^2\text{s}^{-1}$  [95% CI of the median 0.367-0.573], indicating that the size of the cytoplasmic  
349 CTNNB1 complex changes when the WNT pathway is activated. However, the fraction of

350 CTNNB1 that is bound to a cytoplasmic complex remains largely unaltered upon  
351 WNT/CTNNB1 pathway stimulation (Figure 6B).

### 352 Determining the multimerization status of SGFP2-CTNNB1

353 Recent work suggests that the CTNNB1 destruction complex (also known as the  
354 “degradosome”) is a large and multivalent complex, mainly as the result of AXIN and APC  
355 multimerization (reviewed in Schaefer and Peifer, 2019). The second diffusion coefficient  
356 determined by our FCS measurements, is consistent with this model. Such a large, multivalent  
357 destruction complex would be expected to have multiple CTNNB1 binding sites. To measure  
358 the multimerization status (i.e. the number of bound SGFP2-CTNNB1 molecules) within this  
359 cytoplasmic complex, we performed Number and Brightness (N&B) analysis. N&B is a  
360 fluorescence fluctuation spectroscopy technique similar to point FCS, but it makes use of  
361 image stacks acquired over time rather than individual point measurements (Digman, Dalal,  
362 Horwitz, & Gratton, 2008). By quantifying the variance in fluorescence intensity of this stack,  
363 not only the number of particles but also their brightness can be determined. Because  
364 brightness is an inherent property of a fluorophore, a change in brightness is a measure of  
365 the number of fluorophores per particle. In our case, the brightness is indicative of the  
366 number of SGFP2-CTNNB1 molecules per complex. Unfortunately, N&B does not incorporate  
367 diffusion kinetics. Therefore, we cannot differentiate between monomeric (which would have  
368 a brightness of one) and complexed CTNNB1 (which would have a brightness exceeding one  
369 if multiple CTNNB1 molecules reside in a single complex). Therefore, the measured brightness  
370 of SGFP2-CTNNB1 in our N&B analysis is the average of both fractions. We observe that the  
371 total pool of SGFP2-CTNNB1 has a brightness similar to EGFP and SGFP2 monomers in both  
372 the cytoplasm and nucleus (Figure 6C). This suggests that few, if any, of the cytoplasmic or

373 nuclear complexes measured by point FCS, contain multiple SGFP2-CTNNB1 molecules. If the  
374 cytoplasmic SGFP2-CTNNB1 containing complex indeed represents a large, multivalent  
375 destruction complex, this would imply that, quite unexpectedly, most CTNNB1 binding sites  
376 are unoccupied in both the absence and presence of WNT3A.

#### 377 Quantification of SGFP2-CTNNB1 concentrations

378 FCS also allowed us to determine the absolute number of SGFP2-CTNNB1 molecules in the  
379 confocal volume (Figure 6D). After calibration of the confocal volume via reference  
380 measurements, the particle number can be converted to the concentration of endogenous  
381 SGFP2-CTNNB1 in the cell (Table 1). In the absence of WNT, the concentration of SGFP2-  
382 CTNNB1 was 202 nM (median, 95%CI 151-253) in the cytoplasm and 144 nM (median, 95%CI  
383 111-177) in the nucleus. This is consistent with the nuclear exclusion we observed with  
384 confocal imaging (Figure 4E). We measured comparable particle numbers with N&B (Figure 6  
385 supplement 1A).

386 In the presence of WNT3A, we measure a 1.1-fold increase in the total SGFP2-CTNNB1  
387 concentration to 219 nM (median, 95%CI 173-264 nM) in the cytoplasm. This increase is  
388 smaller than expected from fluorescence intensity measurements (Figure 4C, Figure 6  
389 supplement 1), for which we currently have no explanation. In the nucleus the concentration  
390 increases 2.1-fold to 300 nM (median, 95%CI 257-342) upon pathway activation. Nuclear  
391 concentrations of SGFP2-CTNNB1 therefore exceed cytoplasmic concentrations after WNT3A  
392 treatment, consistent with the nuclear accumulation observed with live imaging (Figure 4).  
393 Our observed concentrations of endogenous CTNNB1 in HAP1 cells are in a similar range as  
394 those previously determined by quantitative mass spectrometry in different mammalian cell  
395 lines (Kitazawa et al., 2017; Tan et al., 2012). Of note, the exact concentrations can vary



396 between cell types and may be dependent on the intricacies and assumptions of each  
397 individual technique.

398 Using the fractions obtained from the FCS fitting (Figure 6B), we also determined the  
399 concentration of fast (i.e. free monomeric) and slow (i.e. complexed) SGFP2-CTNNB1 (Figure  
400 6E-F, Table 2). In the cytoplasm we see that the concentration of both fast and slow SGFP2-  
401 CTNNB1 increases upon WNT3A treatment. This challenges the view that mainly monomeric  
402 CTNNB1 accumulates, as commonly depicted (Figure 1). In the nucleus, the concentration of  
403 fast moving CTNNB1 increases 2.0-fold from 95 nM (median, 95%CI 85-133) to 186 nM  
404 (median, 95%CI 164-238), while slow moving CTNNB1 concentrations increase 4.4-fold from  
405 23 nM (median, 95%CI 4-43) to 102 nM (median, 95%CI 67-114). The preferential increase of  
406 the slow-moving fraction suggests that binding affinity of CTNNB1 to the chromatin, and  
407 presumably TCF transcriptional complexes, is increased after WNT3A treatment.

408 Taken together, this is the first time that the concentrations of different functional pools of  
409 endogenous CTNNB1 have been measured in living mammalian cells using functional imaging.

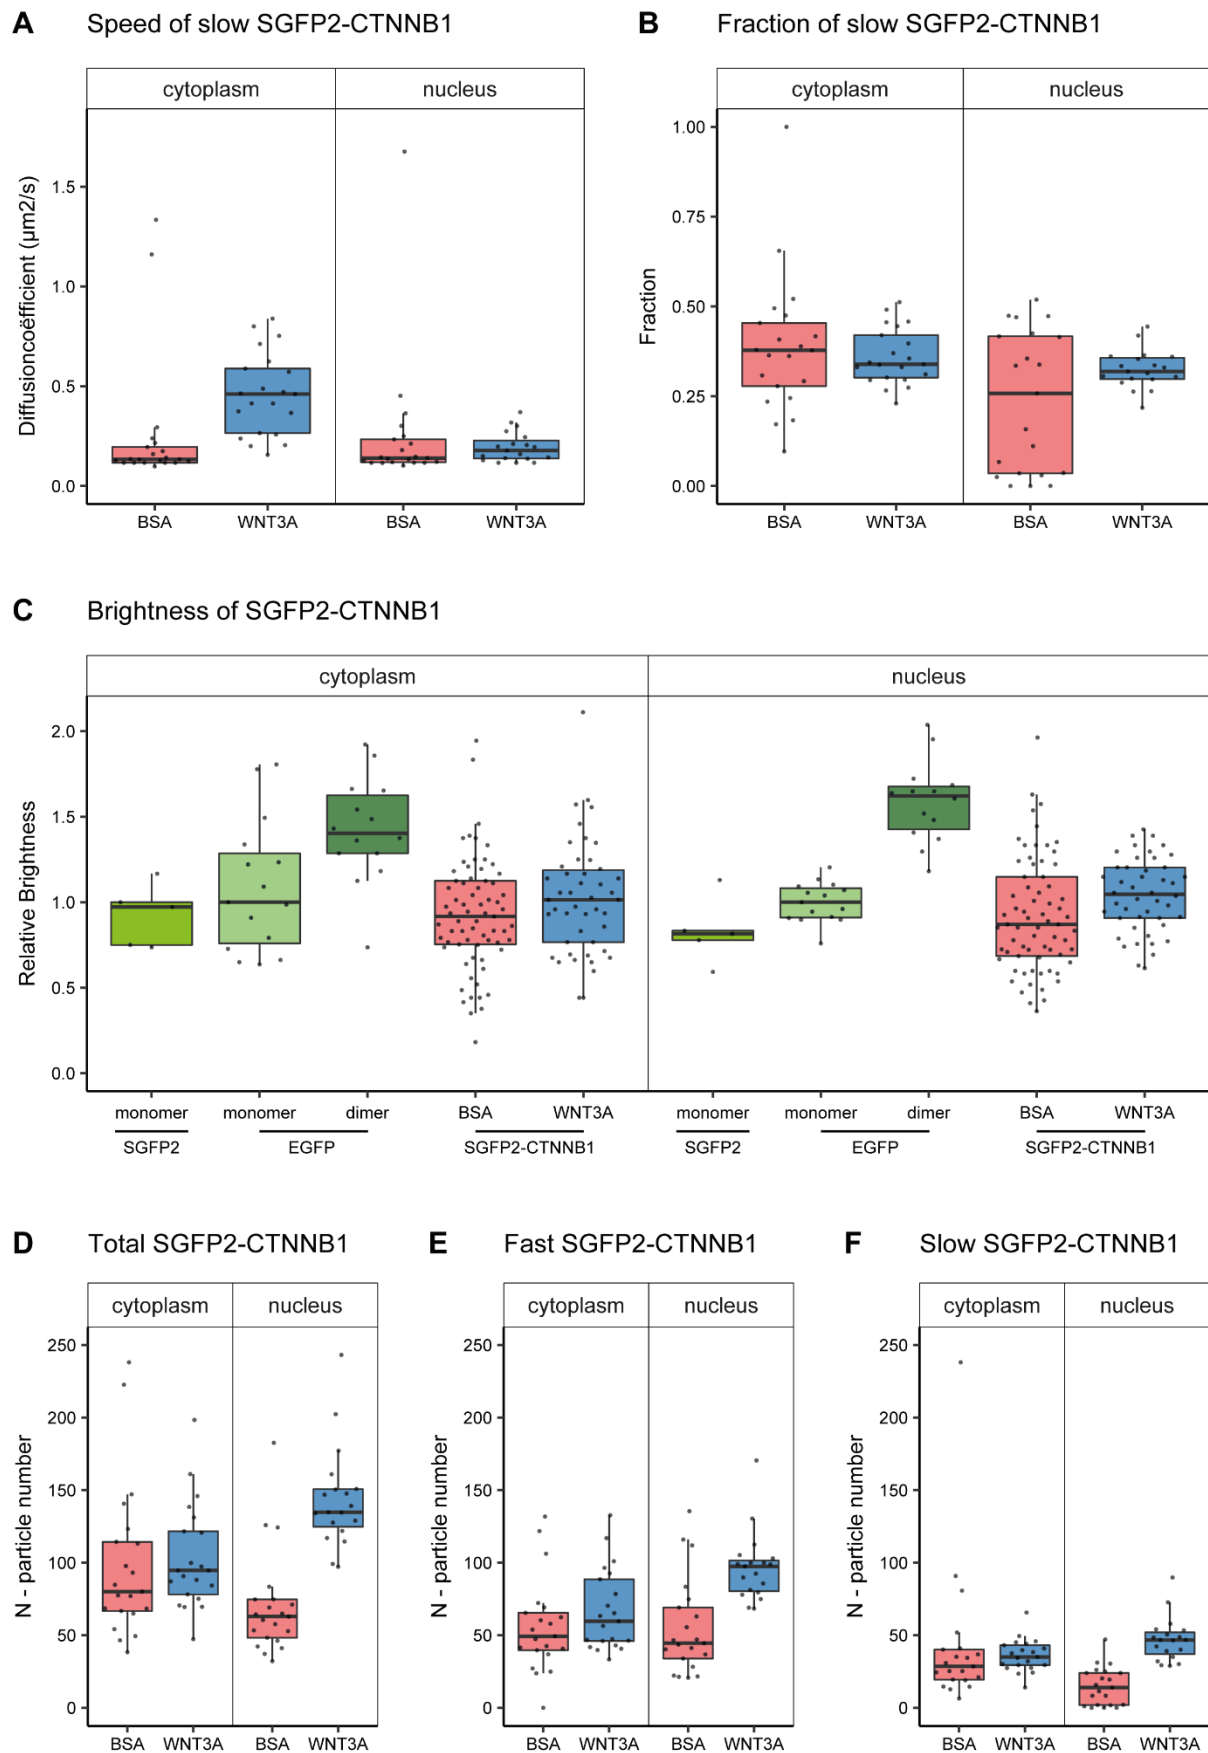

410

411

412

413

**Figure 6:** Mobility and abundance of SGFP2-CTNNB1 molecules in living cells after 4 hours WNT3A treatment or control. A-B) Graphs depicting the speed (A) and fraction (B) of the second diffusion component (i.e. SGFP2-CTNNB1 containing complex) measured by FCS. C) Graph depicting the molecular brightness of SGFP2-CTNNB1 in the cytoplasm and nucleus relative to controls as measured with N&B in the

414 same subcellular compartments. EGFP monomer was used for normalization and EGFP dimer as a control for N&B measurements. D) Graph  
 415 depicting the total number of SGFP2-CTNNB1 particles (monomeric plus complexed) as measured with FCS. E) Graph depicting the number  
 416 of SGFP2-CTNNB1 particles with the fast diffusion component (i.e. free monomeric). F) Graph depicting the number of SGFP2-CTNNB1  
 417 containing particles with the slow diffusion component (i.e. complex associated).  
 418

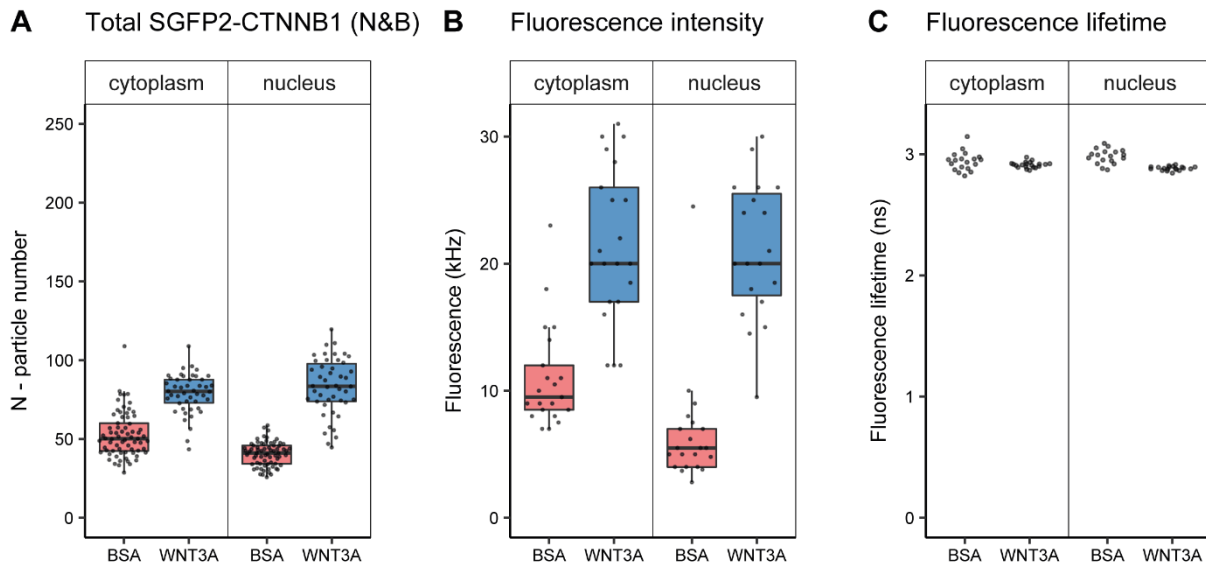

419  
 420 **Figure 6 supplement 1** A) Graph depicting the total number of SGFP2-CTNNB1 particles as measured with N&B. B) Graph depicting the  
 421 average fluorescence intensity at the start of the FCS measurement. The increase in SGFP2-CTNNB1 fluorescence in the cytoplasm (2.1-fold)  
 422 exceeds the increase in the SGFP2-CTNNB1 concentration (1.1-fold, Figure 6D), but does correspond to the relative increase measured by  
 423 time-lapse imaging (1.7-fold, Figure 4C). D) Graph depicting fluorescence lifetimes calculated from the FCS measurements. The Fluorescence  
 424 lifetime of SGFP2-CTNNB1 is independent of the subcellular compartment and treatment. Therefore, photophysical effects are not the cause  
 425 for the difference between the fold-change in fluorescence and concentrations of the FCS measurements as described in C).

426

427 **Table 1:** Total number of SGFP2-CTNNB1 molecules and calculated concentrations obtained with FCS

|             |           | Number of molecules |         | Concentration (nM) |         |
|-------------|-----------|---------------------|---------|--------------------|---------|
| compartment | treatment | median              | 95% CI  | median             | 95% CI  |
| Cytoplasm   | BSA       | 80                  | 67-113  | 202                | 151-253 |
|             | WNT3A     | 95                  | 84-121  | 219                | 173-264 |
| Nucleus     | BSA       | 63                  | 53-71   | 144                | 111-177 |
|             | WNT3A     | 135                 | 128-150 | 300                | 257-342 |

428

429 **Table 2:** Number and concentration of SGFP2-CTNNB1 molecules with fast or slow diffusion times obtained with FCS

|             |           | Fast SGFP2-CTNNB1   |        |                    |         | Slow SGFP2-CTNNB1   |        |                    |        |
|-------------|-----------|---------------------|--------|--------------------|---------|---------------------|--------|--------------------|--------|
|             |           | Number of molecules |        | Concentration (nM) |         | Number of molecules |        | Concentration (nM) |        |
| compartment | treatment | median              | 95% CI | median             | 95% CI  | median              | 95% CI | median             | 95% CI |
| Cytoplasm   | BSA       | 49                  | 41-65  | 104                | 70-149  | 29                  | 21-37  | 60                 | 42-79  |
|             | WNT3A     | 60                  | 46-78  | 145                | 84-181  | 35                  | 29-41  | 75                 | 63-91  |
| Nucleus     | BSA       | 45                  | 37-63  | 95                 | 85-133  | 14                  | 2-24   | 23                 | 4-42   |
|             | WNT3A     | 97                  | 81-100 | 186                | 164-238 | 47                  | 39-51  | 102                | 67-114 |

430

431 A minimal computational model of WNT/CTNNB1 signaling

432 Quantitative measurements and physical parameters of WNT pathway components and their  
433 interactions remain limited (Kitazawa et al., 2017; Lee, Salic, Krüger, Heinrich, & Kirschner,  
434 2003; Tan et al., 2012), especially in living cells. As we obtained measurements of different  
435 functional pools of CTNNB1, we next sought to integrate these parameters in a minimal  
436 computational model of WNT signaling to identify the critical nodes of regulation of  
437 subcellular SGFP2-CTNNB1 (Figure 7A, Table 3-4, Materials and Methods). This minimal model  
438 is based on a previous model by Kirschner and colleagues (Lee et al., 2003), and incorporates  
439 the new data obtained in our study, supplemented with parameters from literature (Lee et  
440 al., 2003; Tan et al., 2012).

441 Our model diverges from the model presented by Lee et al. on two major points. First, the  
442 model is simplified by omitting the details of the destruction complex cycle and the action of  
443 APC and AXIN, since our data do not provide new quantitative data on this part of the  
444 WNT/CTNNB1 signaling cascade. Second, we explicitly include shuttling of CTNNB1 between  
445 the cytoplasm and nucleus in both directions (Schmitz, Rateitschak, & Wolkenhauer, 2013;  
446 Tan, Gardiner, Hirokawa, Smith, & Burgess, 2014).

447 Thus, our model (Figure 7A) describes the binding of cytoplasmic CTNNB1 ('CB') to the  
448 destruction complex ('DC') leading to its phosphorylation and degradation, which releases the  
449 DC. Transport of CTNNB1 from the cytoplasm to the nucleus, allows nuclear CTNNB1 ('NB') to  
450 bind to TCF forming a transcriptional complex (NB-TCF). When WNT is present in the system,  
451 we describe the inactivation of the destruction complex ('DC\*') by DVL.

452 Our final model faithfully recapitulates the dynamic changes that we observe with functional  
453 imaging (compare Figure 7B-F to Figure 4 and 6). Moreover, it reveals two critical regulatory

454 nodes in addition to the requisite inactivation of the destruction complex. The first additional  
455 node of regulation is nuclear import and export (or 'shuttling', described by  $k_6/k_7$ ). Upon WNT  
456 stimulation, the ratio of  $k_6/k_7$  needs to increase in order for the model to match the free  
457 CTNNB1 concentrations we measured by FCS (Table 4, Figure 6E). Thus, the balance shifts  
458 from nuclear export before WNT, to nuclear import after WNT. The second additional node  
459 of regulation is the association of CTNNB1 with the TCF transcriptional complex (or  
460 'retention'), described by  $k_9/k_8$ . Upon WNT stimulation, the ratio of  $k_9/k_8$  needs to decrease  
461 by more than a factor of 10 in order for the model to reproduce the concentrations of free  
462 and bound CTNNB1 in the nucleus as measured by FCS (Table 4, Figure 6E-F). Thus, association  
463 of CTNNB1 to the TCF transcriptional complex is favored after WNT stimulation.

464 In summary, our model suggests that WNT/CTNNB1 signaling is regulated at three distinct  
465 levels of the signal transduction pathway: destruction complex inactivation,  
466 nucleocytoplasmic shuttling and nuclear retention.

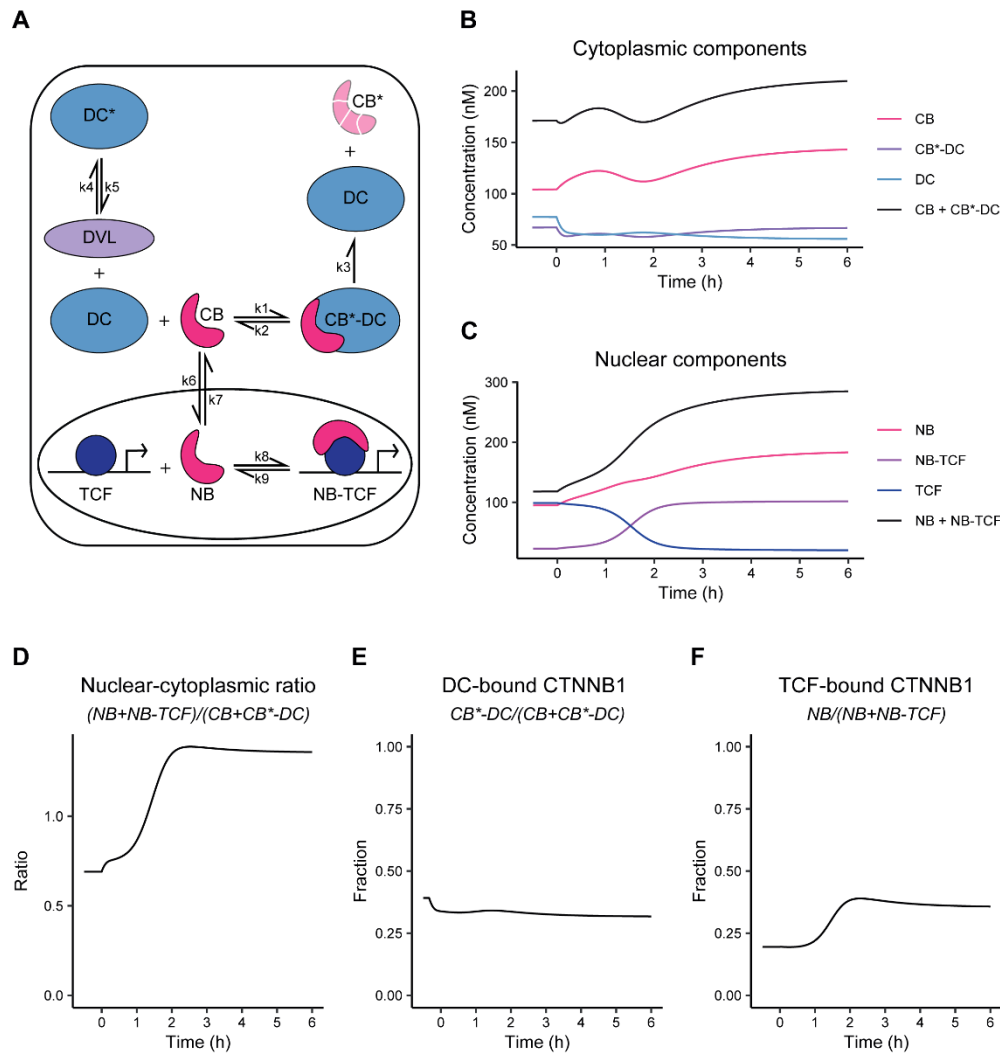

467

468

469

470

471

472

473

474

475

476

477

**Figure 7:** Computational model of WNT/CTNNB1 based on FCS for free and complexed CTNNB1 (Table 1-2). A) Schematic overview of the model. DC=destruction complex, DC\*= DVL-inactivated DC, CB=cytoplasmic CTNNB1, CB\*=phosphorylated CB, NB=nuclear CTNNB1, TCF=TCF/LEF transcription factors, DVL=WNT-activated DVL. The model assumes that there is no activated DVL in the absence of WNT, therefore  $k_4/k_5$  do not play any role in the WNT 'OFF' equilibrium. Note that CB\* is degraded and therefore plays no role in the model. B) Graph depicting the modelled concentrations of cytoplasmic components over time. The black line indicates total concentration of cytoplasmic CTNNB1, corresponding to Figure 4C. C) Graph depicting the modelled concentrations of nuclear components over time. The black line indicates total concentration of nuclear CTNNB1, corresponding to Figure 4D. D) Graph depicting the ratio of total nuclear and cytoplasmic CTNNB1 over time, corresponding to the measurements in 4E. E) Graph depicting the DC-bound CTNNB1 fraction ratio over time. F) Graph depicting the TCF-bound CTNNB1 fraction ratio over time.

478 **Table 3:** Variables Minimal Model of WNT signaling.

| Model name       | Variable         | Compound                        | Values obtained from                   | WNT ON (nM) | WNT OFF (nM) |
|------------------|------------------|---------------------------------|----------------------------------------|-------------|--------------|
| CB               | $x_1$            | Free cytoplasmic CTNNB1         | FCS data this report                   | 104         | 145          |
| DC               | $x_2$            | Free destruction complex        | Model equations                        | 77.3        | 55.5         |
| CB*-DC           | $x_3$            | DC-bound phosphorylated CTNNB1  | FCS data this report*                  | 67*         | 67*          |
| DC*              | $x_4$            | Inactivated destruction complex | Model equations                        | 0           | 21.6         |
| NB               | $x_5$            | Free nuclear CTNNB1             | FCS data this report                   | 95          | 186          |
| TCF              | $x_6$            | Free TCF                        | Model equations                        | 99          | 20           |
| NB-TCF           | $x_7$            | TCF-bound nuclear CTNNB1        | FCS data this report                   | 23          | 102          |
| TCF <sup>0</sup> | TCF <sup>0</sup> | Total TCF                       | $x_7$ and Tan et al., 2012 - Figure 11 | 122         | 122          |

479 \*Under the assumption that  $k_3$  does not change, the levels of CB\*-DC remain equal. Since there was no significant difference between the  
 480 concentration of slow SGFP2-CTNNB1 (Table 2) the average of both medians was used

481

482 **Table 4:** Equilibrium conditions for the Minimal Model of WNT signaling. All rates are multiplied with factor R=20, so that the equilibrium is  
 483 reached at 4.5h according to Figure 4 C, D.

| Rate constant     |                     | Biological process                                                                 | Values based on                               | WNT OFF | WNT ON |
|-------------------|---------------------|------------------------------------------------------------------------------------|-----------------------------------------------|---------|--------|
| $b$               | nMmin <sup>-1</sup> | CTNNB1 synthesis                                                                   | $v_{12}$ from Lee                             | 0.423   | 0.423  |
| $\frac{k_2}{k_1}$ | nM                  | Binding to and phosphorylation by the destruction complex of cytoplasmic CTNNB1    | $K_8$ from Lee                                | 120     | 120    |
| $k_3$             | min <sup>-1</sup>   | Dissociation and degradation of phosphorylated CTNNB1 from the destruction complex | Deduced from $b$ and $x_3$                    | 0.0063  | 0.0063 |
| $\frac{k_5}{k_4}$ | nM                  | Inactivation of the destruction complex by activated DVL                           | Fitted to $x_1$ and $x_7$                     | N.A.    | 2.56   |
| $\frac{k_6}{k_7}$ |                     | Ratio between nuclear import and export of CTNNB1                                  | Deduced from $x_1$ and $x_5$                  | 0.913   | 1.28   |
| $\frac{k_9}{k_8}$ | nM                  | Dissociation of nuclear CTNNB1 from TCF                                            | Deduced from $x_5$ , TCF <sup>0</sup> , $x_7$ | 409     | 36.5   |

484

## 485 Discussion

486 WNT signaling is a critical pathway for tissue development and homeostasis. Although most  
487 core players and many of their molecular interaction mechanisms have been uncovered,  
488 dynamic spatiotemporal information at the endogenous level and with subcellular resolution  
489 is very limited. As both genome editing approaches and quantitative live-cell microscopy have  
490 advanced further, the goal of studying WNT/CTNNB1 signaling at endogenous expression  
491 levels in living cells now is within reach. Maintaining endogenous expression levels is  
492 important, as overexpression may lead to altered stoichiometry of signaling components, as  
493 well as changes in subcellular localization (T. J. Gibson et al., 2013; Mahen et al., 2014).  
494 Indeed, it has been shown that exogenously expressed CTNNB1 is less signaling competent,  
495 probably due to its post-translational modification status (Hendriksen et al., 2008). Here we  
496 generated and characterized clonal HAP1<sup>SGFP2-CTNNB1</sup> knock-in cell lines to study the dynamic  
497 behavior and subcellular complex state of endogenous CTNNB1 in individual living human  
498 cells in the presence and the absence of WNT pathway activation (Figure 2-3).

499 Using live-cell microscopy and automated cell segmentation we observe that endogenous  
500 CTNNB1 only increases 1.7-fold in the cytoplasm and 3.0-fold in the nucleus after WNT3A  
501 treatment, which is consistent with the literature (Jacobsen et al., 2016; Kafri et al., 2016;  
502 Massey et al., 2019). Our data show a faster increase of endogenous CTNNB1 upon GSK3  
503 inactivation or WNT stimulation than two recent studies that used chromobody labeling  
504 (Keller et al., 2018; Traenkle et al., 2015). This could be a cell type specific difference, but  
505 might also be related to the background expression levels of unbound chromobodies that  
506 could mask subtle and early changes in endogenous protein levels. In addition, we show that  
507 the response to WNT3A stimulation and even to global GSK3 inhibition is heterogeneous  
508 (Figure 4A, Figure 4 supplement 2A-B). There are indications that cell cycle, adhesion status



509 and mechano-signaling are important in determining the WNT response (Benham-Pyle, Pruitt,  
510 & Nelson, 2015; Benham-Pyle, Sim, Hart, Pruitt, & Nelson, 2016; Gayrard, Bernaudin,  
511 Déjardin, Seiler, & Borghi, 2018; Howard, Deroo, Fujita, & Itasaki, 2011; Kafri et al., 2016;  
512 Olmeda, Castel, Vilaró, & Cano, 2003; van Leeuwen, Byrne, Jensen, & King, 2007). Although,  
513 it will be interesting to use live-cell imaging to further uncover the roles of these factors in  
514 determining the cell-to-cell variability in WNT responsiveness in the future, here we focus on  
515 novel regulatory aspects of CTNNB1 in the cytoplasm and nucleus.

#### 516 Cytoplasmic regulation of CTNNB1

517 Using FCS, we show for the first time that CTNNB1 resides in slow moving complexes in the  
518 cytoplasm of living mammalian cells (Figure 5-6). The main known cytoplasmic complex  
519 containing CTNNB1 is the destruction complex. The combined weight of the individual  
520 destruction complex components (AXIN, APC, CSNK1 and GSK3) would be expected to result  
521 in a much higher mobility than the cytoplasmic CTNNB1-containing complex we observed.  
522 Currently, evidence is growing that the destruction complex forms phase separated  
523 aggregates (also termed biomolecular condensates) (reviewed in Schaefer and Peifer, 2019).  
524 Oligomerization of AXIN and APC underlies the formation of these aggregates, and this in turn  
525 appears to be required for efficient degradation of CTNNB1 (Fiedler, Mendoza-Topaz,  
526 Rutherford, Mieszczanek, & Bienz, 2011; Kunttas-Tatli, Roberts, & McCartney, 2014; Pronobis,  
527 Deutch, Posham, Mimori-Kiyosue, & Peifer, 2017; Spink, Polakis, & Weis, 2000). There is  
528 some evidence that these aggregates form at (near) endogenous levels (Fagotto et al., 1999;  
529 Faux et al., 2008; Mendoza-Topaz, Mieszczanek, & Bienz, 2011; Pronobis, Rusan, & Peifer,  
530 2015; Schaefer et al., 2018; Thorvaldsen et al., 2015), but it is still an open question what the  
531 exact composition and size of the destruction complex is in a physiological context. It should

532 be noted that our imaging does not visualize such aggregates (Figure 4A). Nevertheless, the  
533 diffusion coefficients we observed for the cytoplasmic CTNNB1 complex are compatible with  
534 a large complex. Interestingly, our N&B data indicate that few, if any, complexes exist that  
535 contain multiple SGFP2-CTNNB1 molecules, which would logically be expected for a large  
536 oligomerized destruction complex with multiple CTNNB1 binding sites.

537 Alternative explanations for the slow diffusion speed of the cytoplasmic CTNNB1 complex  
538 include a monovalent destruction complex in association with (parts of) the proteasome  
539 machinery (Li et al., 2012; Lui et al., 2011; Schaefer et al., 2020) or anchoring of either CTNNB1  
540 itself or any of its interaction partners to the cytoskeleton (reviewed in Bryja et al., 2017;  
541 Fagotto, 2013). Therefore, additional data on the localization and mobility of other  
542 endogenously tagged WNT pathway components are required to determine the exact identity  
543 of the slow-diffusing, cytoplasmic CTNNB1 complex.

544 Of note, our data clearly show that a substantial fraction of CTNNB1 in the cytoplasm remains  
545 bound upon pathway stimulation (Figure 6B). Additionally, we show that this complex has an  
546 increased mobility compared to control treated cells (Figure 6A). Therefore, while the  
547 diffusion coefficient is still very low (indicating a very large complex), this implies it is a  
548 different complex than that observed in the absence of WNT stimulation. The current  
549 literature suggests that the destruction complex is sequestered to the FZD-LRP receptor  
550 complex upon WNT pathway stimulation. Several models exist for how the membrane  
551 sequestration inhibits CTNNB1 degradation, including LRP mediated GSK3 inhibition (Stamos,  
552 Chu, Enos, Shah, & Weis, 2014), sequestration of GSK3 in multi vesicular bodies (Taelman et  
553 al., 2010), (partial) dissociation of the destruction complex (X. Liu, Rubin, & Kimmel, 2005;  
554 Tran & Polakis, 2012), and saturation of CTNNB1 within an intact destruction complex (Li et

555 al., 2012). None of these models include a remaining cytoplasmic CTNNB1 complex in the  
556 presence of WNT ligands, but our data suggest that such a complex must exist.

### 557 Nuclear regulation of CTNNB1

558 The key function of CTNNB1 downstream of WNT is to regulate transcription of TCF/LEF target  
559 genes (Doumpas et al., 2019; Schuijers, Mokry, Hatzis, Cuppen, & Clevers, 2014). Proteomic  
560 analyses have shown that the WNT-responsive transcriptional complex consists of CTNNB1,  
561 TCF/LEF, PYGO and BCL9 and several other large proteins (Fiedler et al., 2015; van Tienen et  
562 al., 2017). Using FCS we showed that CTNNB1 resides in a nuclear complex with a diffusion  
563 coefficient that is compatible with such a DNA-bound transcriptional complex (Figure 6A)  
564 (Lam et al., 2012). Upon pathway activation we see an increase in the fraction and absolute  
565 levels of this slow-diffusing nuclear CTNNB1 complex, consistent with increased CTNNB1  
566 binding to its target sites (Figure 6B, F). The concentration increases to a 102 nM, which  
567 corresponds to something in the order of 20.000 bound CTNNB1 molecules in one nucleus,  
568 assuming a small nuclear volume of 0.36 pL (Tan et al., 2012). Published CHIPseq studies  
569 report many CTNNB1 DNA binding sites, ranging from several hundred to several thousand  
570 sites in mammalian cells (Cantù et al., 2018; Doumpas et al., 2019; Schuijers et al., 2014). It is  
571 therefore conceivable that at least some of the slow-diffusing CTNNB1 particles we measure  
572 represent CTNNB1 that is associated with DNA bound TCF transcriptional complexes.

573 Although CTNNB1 is known to associate with TCF/LEF factors in response to WNT/CTNNB1  
574 signaling to drive transcription (Franz, Shlyueva, Brunner, Stark, & Basler, 2017; Schuijers et  
575 al., 2014), we also detect low levels of nuclear CTNNB1 complex in the absence of a WNT  
576 stimulus (Figure 6B,F). The diffusion coefficient of the nuclear CTNNB1 complex does not  
577 change upon the addition of WNT3A, suggesting that some CTNNB1 is already associated with

578 the DNA even in the absence of a WNT stimulus. Whether the nuclear CTNNB1 complex,  
579 either in the absence or presence of WNT, truly represents TCF/LEF associated CTNNB1  
580 remains to be determined. At this point, we cannot exclude the contribution to TCF/LEF  
581 independent DNA binding (Armstrong, Fagotto, Prothmann, & Rupp, 2012; Essers et al., 2005;  
582 Kormish, Sinner, & Zorn, 2010), or anomalous subdiffusion in the nucleus, either due to  
583 physical obstruction, transient DNA-binding events protein or protein complex formation  
584 (Dross et al., 2009; Kaur et al., 2013; Wachsmuth, Waldeck, & Langowski, 2000).

#### 585 Regulation of CTNNB1 nuclear accumulation

586 In HAP1 cells, endogenous CTNNB1 is excluded from the nucleus in the absence of WNT. Our  
587 live imaging data reveal an immediate and preferential increase in nuclear CTNNB1 upon  
588 WNT3A stimulation, until an equilibrium is reached between the cytoplasmic and nuclear  
589 levels (Figure 4E, Figure 6D). This has previously been observed in HEK293 cells stably  
590 overexpressing low levels of YFP-CTNNB1 (Kafri et al., 2016). Indeed, our computational  
591 model can explain this preferential increase in nuclear CTNNB1 by a shift in the balance of  
592 nuclear translocation from nuclear export to nuclear import after the addition of WNT3A  
593 (Figure 7). This suggests that WNT signaling not only regulates the absolute levels of CTNNB1  
594 through destruction complex inactivation, but also actively changes its subcellular  
595 distribution.

596 Intriguingly, CTNNB1 does not contain nuclear import or export signals and can translocate  
597 independently of classical importin and exporter pathways (Fagotto, Glück, & Gumbiner,  
598 1998; Wiechens & Fagotto, 2001; Yokoya, Imamoto, Tachibana, & Yoneda, 1999). Hence, the  
599 molecular mechanism of CTNNB1 subcellular distribution remains incompletely understood.  
600 Evidence from Fluorescence Recovery After Photobleaching (FRAP) studies suggest that the

601 increase in nuclear CTNNB1 is due to changes in binding to its interaction partners in the  
602 cytoplasm and nucleus (retention) rather than active changes in nuclear import and export  
603 rates (shuttling) (Jamieson, Sharma, & Henderson, 2011; Krieghoff, Behrens, & Mayr, 2006).  
604 We argue that the two are not mutually exclusive, as our experimental data and  
605 computational model suggest that WNT regulates both nucleocytoplasmic shuttling and  
606 nuclear retention of CTNNB1. Indeed, we see an increase of nuclear CTNNB1 complexes in  
607 the nucleus (Figure 6B, F) and the dissociation of CTNNB1 from TCF is reduced over 10-fold in  
608 WNT signaling conditions in our computational model (Table 4). This could be achieved  
609 through posttranslational modification and conformational changes in CTNNB1 as proposed  
610 by others (Gottardi & Gumbiner, 2004; Sayat, Leber, Grubac, Wiltshire, & Persad, 2008; Wu  
611 et al., 2008).

#### 612 Challenges and opportunities for fluorescence fluctuation spectroscopy techniques

613 Using fluorescence fluctuation spectroscopy techniques (FCS and N&B) we have quantified  
614 endogenous CTNNB1 concentrations and complexes in living cells for the first time. This has  
615 yielded novel insights into the CTNNB1 complex state and new parameters for computational  
616 modelling. As with any technique, there are several limitations of point-FCS that we should  
617 consider.

618 First, we are limited by the assumptions we make in the FCS fitting model used. Although  
619 obvious mistakes in assumptions immediately become clear due to bad fitting results and can  
620 therefore be excluded, not every wrong assumption will stand out accordingly. Our data  
621 clearly shows that assuming only one diffusion speed for CTNNB1 in cells would be incorrect  
622 (Figure 5). However, whether we measure a single distinct large complex with the second  
623 diffusion speed, or rather an average of multiple different CTNNB1 containing complexes

624 cannot be determined in our current set-up. In addition, we assume that CTNNB1 is present  
625 as a free-floating monomer (as fixed for our first component), based on previous observations  
626 (Gottardi & Gumbiner, 2004; Maher et al., 2010). However, at least one report suggests that  
627 CTNNB1 is not present as a monomer but rather in small cytoplasmic complexes of ~200 kDa  
628 (Gerlach, Emmink, Nojima, Kranenburg, & Maurice, 2014). As diffusion speed is relatively  
629 insensitive to differences in size (e.g. an 8-fold increase in protein mass is expected to result  
630 in only a 2-fold reduction of the diffusion coefficient for a spherical particle), it is possible that  
631 we do not measure truly free-floating CTNNB1, but rather smaller complexes.

632 Secondly, point FCS gives an indication of the size of the cytoplasmic and nuclear complexes  
633 we observe. However, it cannot provide conclusive evidence on their composition. An exciting  
634 possibility would be to label additional components presumed to be present in the CTNNB1-  
635 containing complexes at the endogenous level to uncover the precise composition and  
636 stoichiometry of protein complexes involved in WNT signaling. For instance Fluorescence  
637 Cross Correlation Spectroscopy (FCCS) could be employed to test if two proteins reside within  
638 the same complex (Elson, 2011; Hink, 2014; Macháň & Wohland, 2014). A combination of  
639 such functional imaging techniques, biochemical and proteomic approaches, together with  
640 specific perturbations and mutant versions of candidate proteins can be employed to further  
641 our understanding of the dynamic composition of endogenous CTNNB1 complexes, as well as  
642 to help us resolve how WNT signaling alters nucleocytoplasmic shuttling of CTNNB1 and  
643 specifically induces nuclear retention of CTNNB1.

#### 644 Summary and outlook

645 In conclusion, we generated a functional fluorescent endogenous CTNNB1 fusion using  
646 CRISPR/Cas9-mediated genome editing. Using live imaging we show a preferential increase in

647 nuclear accumulation of CTNNB1 upon WNT pathway stimulation. Furthermore, state-of-the-  
648 art, quantitative microscopy revealed changes in the abundance and identity of nuclear and  
649 cytoplasmic CTNNB1 complexes upon WNT pathway activation. Combining our experimental  
650 data with computational modeling of WNT/CTNNB1 signaling reveals that WNT regulates the  
651 dynamic distribution of CTNNB1 across different functional pools not only by modulating the  
652 destruction complex, but also by actively changing nucleocytoplasmic shuttling and nuclear  
653 retention.

654 Quantitative functional analyses of proteins at endogenous levels will help us to further  
655 understand the mechanisms of WNT/CTNNB1 signaling and other cellular signal transduction  
656 pathways. As both genome editing and live cell imaging techniques continue to improve,  
657 additional possibilities will open up to address longstanding questions in cellular signaling in  
658 a physiological context with high spatial and temporal resolution. New opportunities and  
659 challenges await as these investigations extend to 3D organoid cultures, developing embryos  
660 and living organisms.

661

## 662 **Material and Methods**

### 663 DNA Constructs

664 The following constructs were used: pSpCas9(BB)-2A-Puro (PX459) V2.0 ((Ran et al., 2013), a  
665 kind gift from Feng Zhang, available from Addgene, plasmid #62988), MegaTopflash ((Hu et  
666 al., 2007), a kind gift from Dr. Christophe Fuerer and Dr. Roel Nusse, Stanford University),  
667 CMV Renilla (E2261, Promega, Madison, WI), pSGFP2-C1 ((G.-J. Kremers et al., 2007), a kind  
668 gift from Dorus Gadella, available from Addgene, plasmid #22881), pmScarlet-i\_C1 (Bindels  
669 et al., 2017), a kind gift from Dorus Gadella, available from Addgene, plasmid # 85044),  
670 pSYFP2-C1 ((G. J. Kremers et al., 2006), a kind gift from Dorus Gadella, available from Addgene,  
671 plasmid #22878), mTurquoise2-C1 ((Goedhart et al., 2012), a kind gift from Dorus Gadella,  
672 available from Addgene, plasmid # 54842), pEGFP (Clontech, Mountain View, CA), pEGFP<sub>2</sub> ((C.  
673 Pack, Saito, Tamura, & Kinjo, 2006), a kind gift from Masataka Kinjo) and pBluescript II KS(+) (Stratagene,  
674 La Jolla, CA).

675 The gRNA targeting the start codon in exon2 of human *CTNNB1* was designed using the MIT  
676 webtool ([crispr.mit.edu](http://crispr.mit.edu)) and cloned into pX459. Oligos RVA567 and RVA568 (Table 5)  
677 encoding the gRNA were annealed, and ligated into BbsI-digested pX459 plasmid as  
678 previously described (Ran et al., 2013) to obtain pX459-CTNNB1-ATG.

679 The repair plasmid for SGFP2-CTNNB1 (pRepair-SGFP2-CTNNB1) was cloned using Gibson  
680 cloning (D. G. Gibson et al., 2009). First, a repair plasmid including the Kozak sequence from  
681 the pSGFP2-C1 plasmid was generated (pRepair-Kozak-SGFP2 -CTNNB1). For this, 5' and 3'  
682 homology arms were PCR amplified from genomic HEK293A DNA with primers RVA618 and  
683 RVA581 (5' arm) or RVA619 and RVA584 (3' arm). SGFP2 was amplified with Gibson cloning  
684 from pSGFP2-C1 with primers RVA582 and RVA583 and the backbone was amplified from SacI



685 digested pBlueScript KS(+) with primers RVA622 and RVA623. The final repair construct  
686 (pRepair-SGFP2-CTNNB1) contains the endogenous *CTNNB1* Kozak sequence before the  
687 SGFP2 ATG. To obtain (pRepair-SGFP2-CTNNB1), the backbone and homology regions were  
688 amplified from pRepair-SGFP2-Kozak-CTNNB1 with primers RVA1616 and RVA1619 and an  
689 SGFP2 without the Kozak sequence was amplified from pSGFP2-C1 with primers RVA1617 and  
690 RVA1618. To generate color variants of the repair plasmid SYFP2, mScarlet-i and mTurquoise2  
691 were also amplified from their respective C1 vectors with primers RVA 1617 and RVA 1618.  
692 PCR products were purified and assembled with a Gibson assembly master mix with a 1:3  
693 (vector:insert) molar ratio. Gibson assembly master mix was either purchased (E2611S, NEB)  
694 or homemade (final concentrations: 1x ISO buffer (100mM Tris-HCL pH 7.5, 10mM MgCl<sub>2</sub>,  
695 0.2M dNTPs (R0181, Thermo Scientific), 10mM DTT (10792782, Fisher), 5% PEG-8000  
696 (1546605, Sigma-Aldrich, St Louis, MO), 1mM NAD<sup>+</sup> (B9007S, NEB)), 0.004 U/μl T5  
697 exonuclease (M0363S, NEB), 0.5 U/μl Phusion DNA Polymerase (F-530L, Thermo Scientific)  
698 and 4 U/μl Taq DNA ligase (M0208S, NEB)).

699 The following plasmids are available from Addgene: pX459-CTNNB1-ATG (#153429), pRepair-  
700 SGFP2-CTNNB1 (#153430), pRepair-mSci-CTNNB1 (#153431), pRepair-SYFP2-CTNNB1  
701 (#153432), pRepair-mTq2-CTNNB1 (#153433)).

## 702 Primers used

703 **Table 5:** primers/oligonucleotides used in this study

|        |                                              |
|--------|----------------------------------------------|
| RVA24  | CAAGTTTGTGTAGGATATGCC                        |
| RVA25  | CGATGTCAATAGGACTCCAGA                        |
| RVA124 | AGTGTGAGGTCCACGGAAA                          |
| RVA125 | CCGTCATGGACATGGAAT                           |
| RVA567 | CACCGTGAGTAGCCATTGTCCACGC                    |
| RVA568 | AAACGCGTGGACAATGGCTACTCAC                    |
| RVA581 | tgctcaccatggtggGATTTTCAAACAGTTGTATGGTATACTTC |
| RVA582 | actgttttggaaaatcCCACCATGGTGAGCAAGGGC         |

|         |                                                                 |
|---------|-----------------------------------------------------------------|
| RVA583  | agtagccattgtccaCTTGACAGCTCGTCCATGCCG                            |
| RVA584  | gacgagctgtacaagTGGACAATGGCTACTCAAGGTTTG                         |
| RVA618  | atagcactcactatagggcgaattggagctGATGCAGTTTTTTTCAATATTGC           |
| RVA619  | ttctagagcggccgccaccgcggtggagctCTCTCTTTTCTTCACCACAACATTTTATTAAAC |
| RVA622  | AAGAGAGAGCTCCACCGCGGTGGCGGCCG                                   |
| RVA623  | TGCATCAGCTCCAATTCGCCCTATAGTGAGTCG                               |
| RVA1616 | tgtccacgctgGATTTTCAAACAGTTGTATGG                                |
| RVA1617 | atacaactgTTTTGAAAATCCAGCGTGGACAATGGTGAGCAAGGGCGAG               |
| RVA1618 | cacaaaccttgagtagccatCTTGACAGCTCGTCCATGC                         |
| RVA1619 | ATGGCTACTCAAGGTTTGTGTCATTAAATC                                  |

704

705 Cell Culture, Treatment and Transfection

706 HAP1 cells (a kind gift from Thijn Brummelkamp, NKI) were maintained in full medium  
707 (colorless IMDM (21056023, Gibco, Thermo Fisher Scientific, Waltham, MA) supplemented  
708 with 10% FBS (10270106, Gibco) and 1X Glutamax (35050061, Gibco)) under 5% CO<sub>2</sub> at 37°C  
709 in humidifying conditions and passaged every 2-3 days using 0.25% Trypsin-EDTA (25200056,  
710 Gibco). Cells were routinely tested for mycoplasma. We verified the haploid identity of the  
711 parental HAP1WT by karyotyping of metaphase spreads. To maintain a haploid population,  
712 cells were resorted frequently (see below) and experiments were performed with low  
713 passage number cells.

714 Where indicated, cells were treated with CHIR99021 (6mM stock solution in DMSO) (1677-5,  
715 Biovision, Milpitas, CA) or Recombinant Mouse Wnt-3a (10µg/ml stock solution in 0.1% BSA  
716 in PBS) (1324-WN-002, R&D systems, Bio-Techne, Minneapolis, MN) with DMSO and 0.1% BSA  
717 in PBS as vehicle controls, respectively.

718 Cells were transfected using Turbofect (R0531, ThermoFisher, Thermo Fisher Scientific,  
719 Waltham, MA), X-tremeGene HP (6366546001, Roche, Basel, Switzerland) or Lipofectamine

720 3000 (Invitrogen, Thermo Fisher Scientific, Waltham, MA) in Opti-MEM (Gibco) according to  
721 the manufacturer's instructions.

722 HAP1<sup>SGFP2-CTNNB1</sup> generation

723 800.000 HAP1 cells/well were plated on 6-well plates. The following day, cells were  
724 transfected with Turbofect and 2000 ng DNA. pX459-CTNNB1-ATG and pRepair-SGFP2-  
725 CTNNB1 were transfected in a 2:1, 1:1 or 1:2 ratio. pSGFP2-C1, pX459 or pX459-CTNNB1-ATG  
726 were used as controls. From 24 to 48 hours after transfection cells were selected with 0.75  
727 µg/ml puromycin (A1113803, Gibco). Next, cells were expanded and passaged as needed until  
728 FACS sorting at day 9. For FACS analysis and sorting cells were washed, trypsinized,  
729 resuspended with full medium and spun down at 1000 rpm for 4 minutes. For sorting, cells  
730 were stained with 1 µg/ml Dapi (D1306, Invitrogen) in HF (2 % FBS in HBSS (14175053, Gibco)),  
731 washed with HF and resuspended in HF. To determine the haploid population, a separate  
732 sample of cells was stained with 5 µM Vybrant® DyeCycle™ Violet Stain (V35003, Invitrogen)  
733 in full medium for 30 minutes and kept in vibrant containing medium. Cells were filtered with  
734 a 70 µm filter and then used for FACS sorting and analysis on a FACSARIA3 (BD, Franklin Lanes,  
735 NJ). Vybrant-stained cells were analyzed at 37° and used to set a size gate only containing  
736 haploid cells. Dapi-stained cells were single cell sorted at 4°C into 96-well plates, that were  
737 previously coated overnight with 0.1 % gelatin (G9391, Sigma-Aldrich) in MQ and contained  
738 full medium supplemented with 1 % penicillin/streptomycin (15140122, Gibco) and 0.025 M  
739 HEPES (H3375 Sigma-Aldrich, 1 M stock solution, pH 7.4, filter sterilized). The 3 independent  
740 clones used in this study were obtained from separate transfections of the same parental cell  
741 line. Resorting of the cell lines was performed with the same FACS procedure, with collection  
742 of cells in 15 mL tubes containing full medium with 1 % penicillin and 0.025 M HEPES.

743 FACS data were analyzed and visualized with FlowJo™.

#### 744 qPCR

745 For qPCR analysis, 100,000 HAP1 cells per well were seeded on a 24-well plate. After 48 hours,  
746 cells were treated with indicated concentrations of CHIR99021. Cells were harvested 24 hours  
747 after treatment. RNA was isolated with Trizol (15596018, Invitrogen) according to the  
748 manufacturer's instructions. cDNA was synthesized using SuperScriptIV (18090010,  
749 Invitrogen) according to the manufacturer's instructions. qPCR was performed with  
750 SyberGreen (10710004, Invitrogen). The endogenous WNT target gene *AXIN2* was amplified  
751 using primers RVA124 and RVA125, and *HPRT* housekeeping control was amplified using  
752 primers RVA24 and RVA25. Relative expression levels of *AXIN2* were calculated using the  
753 comparative Delta-Ct method (Livak & Schmittgen, 2001; Schmittgen & Livak, 2008). Briefly,  
754 *AXIN2* expression was normalized for *HPRT* expression and then the relative fold-change to a  
755 WT DMSO sample was calculated for all clones and conditions.

#### 756 Luciferase Assay

757 For luciferase assays, 100,000 cells per well were seeded on a 24-well plate. Cells were  
758 transfected with 1 µl X-tremeGene HP and 400 ng MegaTopflash reporter and 100 ng CMV-  
759 Renilla or 500 ng SGFP2-C1 as a negative control 24 hours later. Cells were treated with the  
760 indicated concentration of CHIR99021 24 hours after transfection and after another 24 hours  
761 medium was removed and the cells were harvested with 50 µl Passive Lysis Buffer (E1941,  
762 Promega). Luciferase activity was measured on a GloMax Navigator (Promega) using 10 µl  
763 lysate in a black OptiPlate 96-well plate (6005279, Perkin Elmer, Waltham, MA) and 50 µL  
764 homemade firefly and luciferase reagents (according to (Fuerer, Nostro, & Constam, 2014;  
765 Hampf & Gossen, 2006)). Renilla and Luciferase luminescence values were corrected by

766 subtracting the background measured in the SGFP2-transfected control. MegaTopflash  
767 activity was calculated as the ratio of corrected Firefly and Renilla luminescence and  
768 normalized to the relative DMSO control.

#### 769 Western Blot

770 The remaining lysates of the luciferase assay were cleared by centrifugation for 10 minutes at  
771 12.000 g at 4°C. Western blot analysis was performed and quantified as previously described  
772 (Jacobsen et al., 2016). Antibodies were used with the following dilutions, 1:1000 Non-  
773 phosphorylated (Active)  $\beta$ -catenin clone D13A1 (8814S, Cell Signaling, Danvers, MA), 1:2000  
774 total  $\beta$ -catenin clone 14 (610153, BD), 1:1000  $\alpha$ -Tubulin clone DM1A (T9026, Sigma-Aldrich),  
775 1:1000 GFP polyclonal (A-6455, Invitrogen), 1:20.000 IRDye 680LT Goat anti-Rabbit IgG (926-  
776 68021, LI-COR, Lincoln, NE), 1:20.000 IRDye 800CW Donkey anti-Mouse IgG (926–32212, LI-  
777 COR).

#### 778 Time-lapse imaging

779 The day before imaging, 88.000 cells/well were seeded on an 8 well chamber slide with glass  
780 bottom (80827-90, Ibidi, Gräfelfing, Germany). HAP1<sup>SGFP2-CTNNB1</sup> clone 2 was used for the main  
781 Figure 4, all 3 clones were used for Figure 4 supplement 1. Approximately 6 hours before  
782 imaging, medium was replaced with full medium supplemented with 1%  
783 penicillin/streptomycin, 0.025M HEPES and 500nM SiR-DNA (SC007, Spirochrome, Stein am  
784 Rhein, Switzerland). Time lapse experiments were performed on an SP8 confocal microscope  
785 (Leica Microsystems, Wetzlar, Germany) at 37°C with a HC PL APO CS2 63x/1.40 oil objective  
786 (15506350, Leica), 488 and 633 lasers, appropriate AOBs settings, using HyD detectors for  
787 fluorescent signal with a 496-555 for SGFP2-CTNNB1 and 643-764 bandpass for SiR-DNA, and  
788 a transmission PMT. Using multi-position acquisition, up to 24 images were captured every 5

789 minutes. Focus was maintained using AFC autofocus control on demand for every time point  
790 and position. Automated cell segmentation and intensity quantification was performed using  
791 a custom CellProfiler™ pipeline (made available at <https://osf.io/6pmwf/>). Intensities were  
792 normalized per position to the average intensity in the cellular compartment (nucleus or  
793 cytoplasm) for that position before the addition of the compounds. The nuclear cytoplasmic  
794 ratio was calculated by dividing the raw nuclear intensity by the raw cytoplasmic intensity.  
795 Movies and still images were extracted with FIJI/ImageJ.

#### 796 FCS and N&B cell preparation and general settings

797 Two days before FCS and N&B experiments, 44.000 cells/well (HAP1<sup>WT</sup> or HAP1<sup>SGFP2-CTNNB1</sup>  
798 clone 2) were seeded on an 8-well chamber slide with a glass bottom (80827-90, Ibidi). The  
799 day before measuring, HAP1<sup>WT</sup> cells were transfected with ~5 ng pSGFP2-C1, EGFP or EGFP  
800 dimer and ~200 ng pBlueScript KS(+) per well with X-tremeGene HP or Lipofectamine 3000.  
801 Lipofectamine 3000 yielded better transfection efficiency.

802 FCS and N&B measurements were performed on an Olympus FV-1000 equipped with Sepiall  
803 and PicoHarp 300 modules (Picoquant, Berlin, Germany) at room temperature. An Olympus  
804 60x water immersed UPLS Apochromat (N.A. 1.2) objective was used for FCS acquisition and  
805 Figure 3 supplement 1E, and an Olympus 60x silicon immersed UPLS Apochromat (N.A. 1.4)  
806 objective was used for N&B measurements. Green fluorophores were excited with a 488 nm  
807 diode laser (Picoquant) pulsing at 20 MHz and detected through a 405/480-488/560/635 nm  
808 dichroic mirror (Chroma, Bellows Falls, VT) and 525df45 nm bandpass filter (Semrock,  
809 Rochester, NY) with an Avalanche Photodiode (APD) (MPD, Bolzano, Italy). For, figure 3  
810 supplement 1E and for FCS and N&B reference images the same laser and dichroic were used,

811 but the signal was detected through a 505-540 bandpass filter with an internal PMT of the FV-  
812 1000 Olympus microscope.

### 813 FCS data acquisition and analysis

814 For FCS measurements, a confocal image of HAP1<sup>SGFP2-CTNNB1</sup> was recorded. In this reference  
815 image, a single pixel was set as region of interest (ROI), based on its localization in the  
816 cytoplasm or nucleus as judged by the transmission image. In this ROI, the fluorescence  
817 intensity was measured over time using an APD, for typically 120 seconds.

818 FCS measurements were analyzed in FFS Dataprocessor version 2.3 (SSTC, Minsk, Belarus).  
819 The autocorrelation curve ( $G(\tau)$ ) was calculated from the measured intensity ( $I$ ) according to  
820 equation 1. Intensity traces with significant photobleaching, cell movement or focal drift were  
821 excluded from further analysis. From other traces a portion of the trace with minimal (less  
822 than 10%) intensity drift or bleaching was selected to generate autocorrelation curve (AC).

$$G(\tau) = 1 + \frac{\langle \delta I(t) * \delta I(t + \tau) \rangle}{\langle I \rangle^2} \quad \text{Eq. 1}$$

823  
824 The resulting AC was fitted with a Triplet-state-diffusion model, described in equation 2.  $G_\infty$   
825 accounts for offset in the AC caused by intensity drift.  $N$  is the average of the number of  
826 particles that reside in the confocal volume.  $F_{\text{trip}}$  and  $\tau_{\text{trip}}$  describe the fraction of molecules in  
827 the dark state and the relaxation of this dark state respectively. Of note, in this case,  $F_{\text{trip}}$  and  
828  $\tau_{\text{trip}}$  account both for blinking of the fluorescent molecules and for the afterpulsing artefact of  
829 the APD.  $\tau_{\text{diff},i}$  describes the diffusion rate of the fluorescent molecules with the corresponding  
830 fraction,  $F_i$ . This diffusion time depends on the structural parameter ( $sp$ ), which is defined as  
831 the ratio of the axial ( $\omega_z$ ) over the radial axis ( $\omega_{xy}$ ) of the observation volume.

$$G(\tau) = G_{\infty} + \frac{1}{\langle N \rangle} * \frac{F_{trip}}{1 - F_{trip}} e^{\frac{-\tau}{\tau_{trip}}} * \sum_j \frac{F_i}{\left(1 + \frac{\tau}{\tau_{diff,i}}\right) \sqrt{1 + \frac{\tau}{\tau_{diff,i}} * sp^2}} \quad \text{Eq. 2}$$

832

833 The apparent particle numbers ( $N_{apa}$ ) for SGFP2-CTNNB1 were corrected for autofluorescence  
 834 and bleaching (equation 3). The autofluorescence ( $I_{autofluorescence}$ ) of HAP1 cells in the  
 835 nucleus and cytoplasm was measured in untransfected HAP1 cells using the same settings as  
 836 for FCS measurements. The correction for moderate bleaching is based on the intensity of the  
 837 selected portion of the intensity trace for AC calculation ( $I_{ana}$ ) and the intensity at the start of  
 838 the measurement ( $I_{start}$ ).

839 The size and shape of the observation volume was calibrated daily by measuring Alexa Fluor™  
 840 488 NHS Ester (A20000, Molecular probes, Thermo Scientific, stock dilution in MQ) in PBS in  
 841 a black glass-bottom cell imaging plate with 96 wells (0030741030, Eppendorf, Hamburg,  
 842 Germany). From the FCS measurements of Alexa488, the  $\tau_{diff}$  and  $sp$  were determined by  
 843 fitting with a single diffusion and blinking component. The diffusion coefficient ( $D$ ) of  
 844 Alexa488 in aqueous solutions at 22.5 °C is 435  $\mu\text{m}^2\text{s}^{-1}$  (Petrášek & Schwille, 2008). From these  
 845 parameters, the axial diameter can be determined with equation 4 and the volume can be  
 846 approximated by a cylinder (equation 5). This allows for transformation of particle numbers  
 847 to concentrations (equation 5) and diffusion times to diffusion coefficients (equation 4) that  
 848 are independent of measurement settings and small daily changes in alignment of the  
 849 microscope.

$$N_{corr} = N_{apa} * \left[1 - \frac{I_{autofluorescence}}{I_{total}}\right]^2 * \left[\frac{I_{start}}{I_{ana}}\right] \quad \text{Eq. 3}$$



$$\tau_{diff} = \frac{\omega_{xy}^2}{4D} \quad \text{Eq. 4}$$

$$V = 2\pi\omega_{xy}^3 * sp \quad \text{Eq. 5}$$

$$C = \frac{N_{corr}}{V * N_A} \quad \text{Eq. 6}$$

850 The model to fit SGFP2-CTNNB1 measurements contained 2 diffusion components. The first  
851 diffusion component was fixed to the speed of monomeric SGFP2-CTNNB1. To estimate the  
852 speed of monomeric SGFP2-CTNNB1, the speed of free floating SGFP2, transfected in HAP1  
853 cells, was measured to be  $24.1 \mu\text{m}^2\text{s}^{-1}$  using FCS. Subsequently, this speed was used to  
854 calculate the speed of monomeric SGFP2-CTNNB1 with Einstein-Stokes formula (Equation 7).  
855 As the temperature (T), dynamic viscosity ( $\eta$ ) and Boltzmann's constant ( $k_B$ ) are equal  
856 between SGFP2 and SGFP2-CTNNB1 measurements, the expected difference in diffusion  
857 speed is only caused by the radius (r) of the diffusing molecule. The difference in radius was  
858 approximated by the cubic root of the ratio of the molecular weight of the SGFP2-CTNNB1  
859 fusion protein ( $88 + 27 = 115$  kDa) and the size of the SGFP2 protein (27 kDa), thus expecting a  
860 1.62 times lower diffusion coefficient (compared to free floating SGFP2) of  $14.9 \mu\text{m}^2\text{s}^{-1}$  for  
861 SGFP2-CTNNB1.

$$D = \frac{k_B T}{6\pi\eta r} \quad \text{Eq. 7}$$

862 In the fitting model, the structural parameter was fixed to the one determined by the  
863 Alexa488 measurements of that day. To ensure good fitting, limits were set for other  
864 parameters;  $G_\infty$  [0.5-1.5], N [0.001, 500],  $\tau_{trip}$  [ $1 * 10^{-6}$ -0.05 ms],  $\tau_{diff2}$  [10-200 ms].

865 N&B data acquisition and analysis

866 For N&B analysis, 50 images were acquired per measurement with a pixel time of 100  $\mu\text{s}$ /pixel  
867 and a pixel size of 0.138-0.207  $\mu\text{m}$ . The fluorescent signal was acquired with the APD  
868 described above for the FCS measurements. As a control and to optimize acquisition settings,  
869 HAP1 cells transfected with SGFP2, EGFP monomer or dimer were measured alongside  
870 HAP1<sup>SGFP2-CTNNB1</sup> cells treated with BSA or WNT3A. APD readout was converted to a TIF stack  
871 using a custom build *.ptu* converter (Crosby et al., 2013). This TIF stack was further analyzed  
872 using an ImageJ macro script (modified from (Crosby et al., 2013), made available at  
873 <https://osf.io/ys5qw/>) based on Digman, Dalal, Horwitz, & Gratton, 2008.

874 Within the script, average brightness and particle numbers were calculated for nuclear or  
875 cytoplasmic ROIs, which were set based on transmission image. Static or slow-moving  
876 particles, including membrane regions, were excluded by thresholding and/or ROI selection,  
877 since they can severely impact the brightness measured.

878 Data representation and statistical analysis

879 Data processing and representation were performed in RStudio (version 1.1.456 running R  
880 3.5.1 or 3.6.1). 95% confidence intervals of the median mentioned in the text and shown in  
881 Table 1-2 were calculated using PlotsOfDifferences (Goedhart, 2019). Representation of the  
882 imaging data in Figure 4 supplement 2 and in supplementary movies 3-4 were generated in  
883 RStudio using a script based on PlotsOfDifferences (made available at <https://osf.io/sxakf/>).

884 Model description

885 We developed a minimal model for WNT signaling based on a previous model from the  
886 Kirschner group (Lee et al., 2003). The R source code of the model is available at  
887 <https://osf.io/2e8by/>.

888 Our minimal model comprises the following reactions:

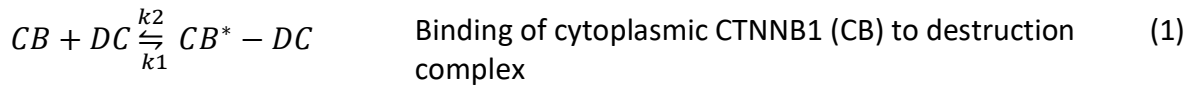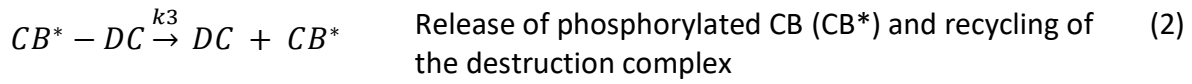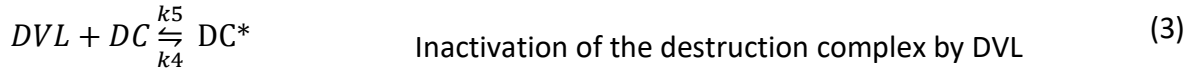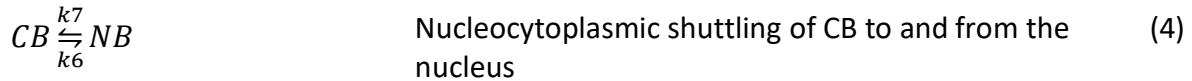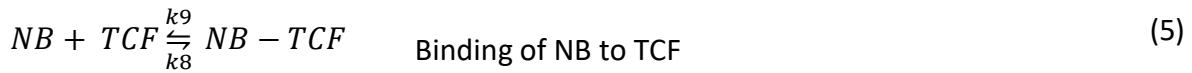

889 Below, we show the differential equations that govern the concentrations of the different  
 890 compounds over time for the reactions described above. Table 3 in the main text gives the  
 891 correspondence between the variables (i.e.  $x_1$ ) in the differential equations and the model  
 892 name (i.e. CB) in the reactions. The parameter  $w$  in equations (7) and (8) is  $w = 0$  in the  
 893 absence of WNT and  $w = 1$  if WNT is present, i.e. in our minimal model the inactive form of  
 894 the destruction complex ( $DC^*$ ) is only present if WNT is present. The parameter  $b$  in equation  
 895 (6) represents the constant production of CTNNB1, corresponding to  $v_{12}$  in Lee et al., 2003.

$$\frac{dx_1}{dt} = -k_1x_1x_2 + k_2x_3 - k_6x_1 + k_7x_6 + b \quad (6)$$

$$\frac{dx_2}{dt} = -k_1x_1x_2 + (k_2 + k_3)x_3 - w(k_4x_2 - k_5x_4) \quad (7)$$

$$\frac{dx_3}{dt} = k_1x_1x_2 - (k_2 + k_3)x_3 \quad (8)$$

$$\frac{dx_4}{dt} = w(k_4x_2 - k_5x_4) \quad (9)$$

$$\frac{dx_5}{dt} = k_6x_1 - k_7x_5 - k_8x_5x_6 + k_9x_7 \quad (10)$$

$$\frac{dx_6}{dt} = -k_8x_5x_6 + k_9x_7 \quad (11)$$

$$\frac{dx_7}{dt} = k_8x_5x_6 - k_9x_7 \quad (12)$$

896

897 Equilibrium conditions without WNT

898 The parameters in our model can in part be determined from our measurements of the  
899 equilibrium concentrations of CB, NB and their complexes, see Table 3-4 in the main text.

900 Where we could not determine the parameters from our measurements, we used published  
901 values as indicated.

902 Under equilibrium conditions, the concentrations of the compounds do not change with time  
903 and the left-hand side of equations (6) - (12) is zero. From equations (10) and (11) we can  
904 determine the ratio of the rate constants  $k_6$  and  $k_7$  from the measured values of  $x_1$  and  $x_5$ :

$$k_6 x_1 = k_7 x_5 \Leftrightarrow \frac{k_6}{k_7} = \frac{x_5}{x_1} = \frac{95}{104} = 0.913 \quad (13)$$

905 From equations (6), (8), (10) and (11) we have:

$$-k_3 x_3 + b = 0 \Leftrightarrow k_3 = \frac{b}{x_3} = \frac{0.423}{67} = 0.0063 \quad (14)$$

906 Our reaction (1) corresponds closely to step 8 in Lee et al. therefore, we use the value of the  
907 dissociation constant  $K_8 = 120$  nM from Lee et al. for our dissociation constant  $K_1 = \frac{k_2}{k_1}$ .

908 To calculate the dissociation constant for the NB-TCF complex, we estimate an equilibrium  
909 concentration for free TCF ( $x_6$ ) from Tan et al. (2012). From their Figure 11 it is seen that the  
910 bound TCF concentration in equilibrium in the presence of WNT has about the same value as  
911 the initial free TCF concentration and that no initial bound TCF is present. However, we  
912 measured NB-TCF also in the initial state. Therefore, we consider the free TCF concentration  
913 value from Tan et al. as a lower bound for the estimate of total TCF. Also, from Figure 11 of  
914 Tan et al. (2012) we estimate that of the initial free TCF, a fifth remains in the nucleus as free  
915 TCF after WNT is turned on. We measured 102 nM NB-TCF in the nucleus after the application  
916 of WNT. This leads to an estimate of the total concentration of TCF,  $\text{TCF}^0$ , in the nucleus of:

917  $[TCF^0] = 102 + 0.2 \times 102 = 122$  nM. If we assume that the total TCF concentration  
 918 does not change by the application of WNT, we calculate the dissociation constant of the NB-  
 919 TCF complex from equation (12):

$$k_8 x_5 (TCF^0 - x_7) = k_9 x_7 \Rightarrow \frac{k_9}{k_8} = K_2 = \frac{x_5 (TCF^0 - x_7)}{x_7} = \frac{95 * 99}{23} = 409 \quad (15)$$

920

921 Equilibrium conditions with WNT

922 We model the action of WNT by deactivation of the destruction complex by DVL through  
 923 reaction 3 by setting  $w = 1$  in equations (7) and (9). The dissociation constant of CB\*-DC,  $K_1$ ,  
 924 is assumed not to change in the presence of WNT. The measurements of free CB and NB in  
 925 equilibrium (see Table 2) give for the ratio of  $k_6$  and  $k_7$ :

$$k_6 x_1 = k_7 x_5 \Leftrightarrow \frac{k_6}{k_7} = \frac{x_5}{x_1} = \frac{186}{145} = 1.28 \quad (16)$$

926 The value of the rate of decay of the phosphorylated complex CB\*-DC,  $k_3$ , is found to be the  
 927 same for the "without WNT" situation:

$$-k_3 x_3 + b = 0 \Leftrightarrow k_3 = \frac{b}{x_3} = \frac{0.423}{67} = 0.0063 \quad (17)$$

928 To uniquely determine the ratio of  $k_4$  and  $k_5$ , we need the concentrations of the destruction  
 929 complex DC and DC\* neither of which we have access to. We can, however, fit this ratio with  
 930 our model to the measured values of  $x_1$  and  $x_7$  and find  $k_4/k_5 = 2.56$ .

931 We again calculate the dissociation constant of the NB-TCF complex from equation (12), using  
 932 the concentrations for NB and NB-TCF obtained with FCS.

$$k_8 x_5 (TCF^0 - x_7) = k_9 x_7 \Rightarrow \frac{k_9}{k_8} = K_2 = \frac{x_5 (TCF^0 - x_7)}{x_7} = \frac{186 * 20}{102} = 36.5 \quad (18)$$

933 Notice that we determined the ratios of the rate constants from the measured equilibrium  
934 values of free and bound CTNNB1 in the cytoplasm and the nucleus. This means that our rate  
935 constants are determined up to a multiplicative factor: the equilibrium equations do not  
936 change if all rate constants  $k_i$  and the parameter  $b$  are multiplied by the same factor,  $R$ . The  
937 factor  $R$  determines the rate at which our model system reaches equilibrium. By comparing  
938 the times equilibrium was reached by the cytoplasmic and nuclear SGFP2-CTNNB1 signals  
939 (Figure 4 C, D) of about 4.5 hours, we fitted a factor  $R = 20$  for our model.

940

## 941 Acknowledgements

942 We thank the van Leeuwenhoek Centre for Advanced Microscopy (LCAM, Section Molecular  
943 Cytology, Swammerdam Institute for Life Sciences, University of Amsterdam) for the use of  
944 their facilities and LCAM staff for sharing their expertise and providing technical support,  
945 Jasmijn Span for cloning the color variants of the repair plasmid as a student in our lab, Marten  
946 Postma and Joachim Goedhart for assistance with data handling and analysis, Dorus Gadella  
947 and Tanne van der Wal for carefully reading the manuscript, and all colleagues for stimulating  
948 discussions and suggestions.

949 This work was funded by a MacGillavry fellowship (University of Amsterdam, to RvA), KWF  
950 Kankerbestrijding (career development award ANW 2013-6057 and KWF/Alpe d'HuZes  
951 project grant UVA 2015-8014, to RvA), and the Dutch Research Council (NWO VIDI grant  
952 864.13.002 and OCENW.KLEIN.169, to RvA).

## 953 Competing interest statement

954 The authors have no competing interests to declare.

955

## 956 References

- 957 Aberle, H., Bauer, A., Stappert, J., Kispert, A., & Kemler, R. (1997).  $\beta$ -catenin is a target for  
958 the ubiquitin-proteasome pathway. *The EMBO Journal*, *16*(13), 3797–3804.
- 959 Amit, S., Hatzubai, A., Birman, Y., Andersen, J. S., Ben-shushan, E., Mann, M., ... Alkalay, I.  
960 (2002). Axin-mediated CKI phosphorylation of  $\beta$ -catenin at Ser 45: a molecular switch  
961 for the Wnt pathway. *Genes & Development*, *16*, 1066–1076.  
962 <https://doi.org/10.1101/gad.230302.somal>
- 963 Andersson, B. S., Beran, M., Pathak, S., Goodacre, A., Barlogie, B., & McCredie, K. B. (1987).  
964 Ph-positive chronic myeloid leukemia with near-haploid conversion in vivo and  
965 establishment of a continuously growing cell line with similar cytogenetic pattern.  
966 *Cancer Genetics and Cytogenetics*, *24*(2), 335–343. [https://doi.org/10.1016/0165-](https://doi.org/10.1016/0165-4608(87)90116-6)  
967 [4608\(87\)90116-6](https://doi.org/10.1016/0165-4608(87)90116-6)
- 968 Armstrong, N. J., Fagotto, F., Prothmann, C., & Rupp, R. A. W. (2012). Maternal Wnt/ $\beta$ -  
969 catenin signaling coactivates transcription through NF- $\kappa$ B binding sites during xenopus  
970 axis formation. *PLoS ONE*, *7*(5). <https://doi.org/10.1371/journal.pone.0036136>
- 971 Bain, J., Plater, L., Elliott, M., Shpiro, N., Hastie, C. J., Mclauchlan, H., ... Cohen, P. (2007). The  
972 selectivity of protein kinase inhibitors: A further update. *Biochemical Journal*, *408*(3),  
973 297–315. <https://doi.org/10.1042/BJ20070797>
- 974 Barker, N., van Es, J. H., Kuipers, J., Kujala, P., van den Born, M., Cozijnsen, M., ... Clevers, H.  
975 (2007). Identification of stem cells in small intestine and colon by marker gene Lgr5.  
976 *Nature*, *449*(7165), 1003–1007. <https://doi.org/10.1038/nature06196>
- 977 Behrens, J., von Kries, J. P., Kühl, M., Bruhn, L., Wedlich, D., Grosschedl, R., & Birchmeier, W.



- 978 (1996). Functional interaction of beta-catenin with the transcription factor LEF-1.  
979 *Nature*. <https://doi.org/10.1038/382638a0>
- 980 Benham-Pyle, B. W., Pruitt, B. L., & Nelson, W. J. (2015). Mechanical strain induces E-  
981 cadherin-dependent Yap1 and  $\beta$ -catenin activation to drive cell cycle entry. *Science*,  
982 *348*(6238), 1024–1027. <https://doi.org/10.1126/science.aaa4559>
- 983 Benham-Pyle, B. W., Sim, J. Y., Hart, K. C., Pruitt, B. L., & Nelson, W. J. (2016). Increasing  $\beta$ -  
984 catenin/Wnt3A activity levels drive mechanical strain-induced cell cycle progression  
985 through mitosis. *ELife*, *5*(OCTOBER2016), 1–28. <https://doi.org/10.7554/eLife.19799>
- 986 Bilic, J., Huang, Y.-L., Davidson, G., Zimmermann, T., Cruciat, C.-M. C.-M., Bienz, M., &  
987 Niehrs, C. (2007). Wnt induces LRP6 signalosomes and promotes dishevelled-  
988 dependent LRP6 phosphorylation. *Science (New York, N.Y.)*, *316*(5831), 1619–1622.  
989 <https://doi.org/10.1126/science.1137065>
- 990 Bindels, D. S., Haarbosch, L., van Weeren, L., Postma, M., Wiese, K. E., Mastop, M., ...  
991 Gadella Jr, T. W. J. (2017). mScarlet: a bright monomeric red fluorescent protein for  
992 cellular imaging. *Nature Methods*, *14*(1), 53–56. <https://doi.org/10.1038/nmeth.4074>
- 993 Bryja, V., Červenka, I., & Čajánek, L. (2017). The connections of Wnt pathway components  
994 with cell cycle and centrosome: side effects or a hidden logic? *Critical Reviews in*  
995 *Biochemistry and Molecular Biology*. <https://doi.org/10.1080/10409238.2017.1350135>
- 996 Canaj, H., Hussmann, J. A., Li, H., Beckman, K. A., Goodrich, L., Cho, Nathan, H., ... Leonetti,  
997 M. D. (2019). Deep profiling reveals substantial heterogeneity of integration outcomes  
998 in CRISPR knock-in experiments. *BioRxiv*. <https://doi.org/10.1101/841098>
- 999 Cantù, C., Felker, A., Zimmerli, D., Prummel, K. D., Cabello, E. M., Chiavacci, E., ... Mosimann,

- 1000 C. (2018). Mutations in Bcl9 and Pygo genes cause congenital heart defects by tissue-  
1001 specific perturbation of Wnt/ $\beta$ -catenin signaling. *Genes and Development*, 32(21–22),  
1002 1443–1458. <https://doi.org/10.1101/gad.315531.118>
- 1003 Carette, J. E., Raaben, M., Wong, A. C., Herbert, A. S., Obernosterer, G., Mulherkar, N., ...  
1004 Brummelkamp, T. R. (2011). Ebola virus entry requires the cholesterol transporter  
1005 Niemann-Pick C1. *Nature*, 477(7364), 340–343. <https://doi.org/10.1038/nature10348>
- 1006 Chhabra, S., Liu, L., Goh, R., Kong, X., & Warmflash, A. (2019). Dissecting the dynamics of  
1007 signaling events in the BMP, WNT, and NODAL cascade during self-organized fate  
1008 patterning in human gastruloids. *PLOS Biology*, 17(10), e3000498.  
1009 <https://doi.org/10.1371/journal.pbio.3000498>
- 1010 Crosby, K. C., Postma, M., Hink, M. A., Zeelenberg, C. H. C., Adjobo-Hermans, M. J. W., &  
1011 Gadella, T. W. J. (2013). Quantitative analysis of self-association and mobility of  
1012 Annexin A4 at the plasma membrane. *Biophysical Journal*, 104(9), 1875–1885.  
1013 <https://doi.org/10.1016/j.bpj.2013.02.057>
- 1014 Digman, M. A., Dalal, R., Horwitz, A. F., & Gratton, E. (2008). Mapping the number of  
1015 molecules and brightness in the laser scanning microscope. *Biophysical Journal*, 94(6),  
1016 2320–2332. <https://doi.org/10.1529/biophysj.107.114645>
- 1017 Doumpas, N., Lampart, F., Robinson, M. D., Lentini, A., Nestor, C. E., Cantù, C., & Basler, K.  
1018 (2019). TCF / LEF dependent and independent transcriptional regulation of Wnt/ $\beta$ -  
1019 catenin target genes . *The EMBO Journal*, 38(2), 1–14.  
1020 <https://doi.org/10.15252/emj.201798873>
- 1021 Dross, N., Spriet, C., Zwerger, M., Müller, G., Waldeck, W., & Langowski, J. (2009). Mapping

- 1022 eGFP oligomer mobility in living cell nuclei. *PLoS ONE*, 4(4), 1–13.
- 1023 <https://doi.org/10.1371/journal.pone.0005041>
- 1024 Eckert, A. F., Gao, P., Wesslowski, J., Wang, X., Rath, J., Nienhaus, K., ... Nienhaus, G. U.
- 1025 (2020). Measuring ligand-cell surface receptor affinities with axial line-scanning
- 1026 fluorescence correlation spectroscopy. *ELife*, 9. <https://doi.org/10.7554/eLife.55286>
- 1027 Elson, E. L. (2011). Fluorescence correlation spectroscopy: Past, present, future. *Biophysical*
- 1028 *Journal*, 101(12), 2855–2870. <https://doi.org/10.1016/j.bpj.2011.11.012>
- 1029 Essers, M. A. G. G., De Vries-Smits, L. M. M. M., Barker, N., Polderman, P. E., Burgering, B. M.
- 1030 T. T., & Korswagen, H. C. (2005). Functional interaction between  $\beta$ -catenin and FOXO in
- 1031 oxidative stress signaling. *Science*, 308(5725), 1181–1184.
- 1032 <https://doi.org/10.1126/science.1109083>
- 1033 Essletzbichler, P., Konopka, T., Santoro, F., Chen, D., Gapp, B. V., Kralovics, R., ...
- 1034 Bückstümmer, T. (2014). Megabase-scale deletion using CRISPR/Cas9 to generate a
- 1035 fully haploid human cell line. *Genome Research*, 24(12), 2059–2065.
- 1036 <https://doi.org/10.1101/gr.177220.114>
- 1037 Fagotto, F. (2013, April 19). Looking beyond the Wnt pathway for the deep nature of  $\beta$ -
- 1038 catenin. *EMBO Reports*. John Wiley & Sons, Ltd.
- 1039 <https://doi.org/10.1038/embor.2013.45>
- 1040 Fagotto, F., Glück, U., & Gumbiner, B. M. (1998). Nuclear localization signal-independent
- 1041 and importin/karyopherin-independent nuclear import of  $\beta$ -catenin. *Current Biology*,
- 1042 8(4), 181–190. [https://doi.org/10.1016/S0960-9822\(98\)70082-X](https://doi.org/10.1016/S0960-9822(98)70082-X)
- 1043 Fagotto, F., Jho, E. H., Zeng, L., Kurth, T., Joos, T., Kaufmann, C., & Costantini, F. (1999).

- 1044 Domains of Axin involved in protein-protein interactions, Wnt pathway inhibition, and  
1045 intracellular localization. *Journal of Cell Biology*, 145(4), 741–756.  
1046 <https://doi.org/10.1083/jcb.145.4.741>
- 1047 Faux, M. C., Coates, J. L., Catimel, B., Cody, S., Clayton, A. H. A., Layton, M. J., & Burgess, A.  
1048 W. (2008). Recruitment of adenomatous polyposis coli and beta-catenin to axin-puncta.  
1049 *Oncogene*, 27(44), 5808–5820. <https://doi.org/10.1038/onc.2008.205>
- 1050 Fiedler, M., Graeb, M., Mieszczanek, J., Rutherford, T. J., Johnson, C. M., & Bienz, M. (2015).  
1051 An ancient Pygo-dependent Wnt enhanceosome integrated by chip/LDB-SSDP. *ELife*,  
1052 4(AUGUST2015), 1–22. <https://doi.org/10.7554/eLife.09073>
- 1053 Fiedler, M., Mendoza-Topaz, C., Rutherford, T. J., Mieszczanek, J., & Bienz, M. (2011).  
1054 Dishevelled interacts with the DIX domain polymerization interface of Axin to interfere  
1055 with its function in down-regulating  $\beta$ -catenin. *Proceedings of the National Academy of*  
1056 *Sciences of the United States of America*, 108(5), 1937–1942.  
1057 <https://doi.org/10.1073/pnas.1017063108>
- 1058 Franz, A., Shlyueva, D., Brunner, E., Stark, A., & Basler, K. (2017). Probing the canonicity of  
1059 the Wnt/Wingless signaling pathway. *PLoS Genetics*, 13(4), 1–18.  
1060 <https://doi.org/10.1371/journal.pgen.1006700>
- 1061 Fuerer, C., Nostro, M. C., & Constam, D. B. (2014). Nodal·Gdf1 heterodimers with bound  
1062 prodomains enable serum-independent nodal signaling and endoderm differentiation.  
1063 *Journal of Biological Chemistry*, 289(25), 17854–17871.  
1064 <https://doi.org/10.1074/jbc.M114.550301>
- 1065 Gammons, M., & Bienz, M. (2018). Multiprotein complexes governing Wnt signal

- 1066 transduction. *Current Opinion in Cell Biology*, 51, 42–49.
- 1067 <https://doi.org/10.1016/j.ceb.2017.10.008>
- 1068 Gayrard, C., Bernaudin, C., Déjardin, T., Seiler, C., & Borghi, N. (2018). Src- and confinement-  
1069 dependent FAK activation causes E-cadherin relaxation and  $\beta$ -catenin activity. *Journal*  
1070 *of Cell Biology*, 217(3), 1063–1077. <https://doi.org/10.1083/jcb.201706013>
- 1071 Gerlach, J. P., Emmink, B. L., Nojima, H., Kranenburg, O., & Maurice, M. M. (2014). Wnt  
1072 signalling induces accumulation of phosphorylated  $\beta$ -catenin in two distinct cytosolic  
1073 complexes. *Open Biology*, 4(11), 140120. <https://doi.org/10.1098/rsob.140120>
- 1074 Gibson, D. G., Young, L., Chuang, R. Y., Venter, J. C., Hutchison, C. A., & Smith, H. O. (2009).  
1075 Enzymatic assembly of DNA molecules up to several hundred kilobases. *Nature*  
1076 *Methods*, 6(5), 343–345. <https://doi.org/10.1038/nmeth.1318>
- 1077 Gibson, T. J., Seiler, M., & Veitia, R. A. (2013). The transience of transient overexpression.  
1078 *Nature Methods*, 10(8), 715–721. <https://doi.org/10.1038/nmeth.2534>
- 1079 Goedhart, J. (2019). PlotsOfDifferences - a web app for the quantitative comparison of  
1080 unpaired data. *BioRxiv*, 578575. <https://doi.org/10.1101/578575>
- 1081 Goedhart, J., von Stetten, D., Noirclerc-Savoye, M., Lelimosin, M., Joosen, L., Hink, M. A., ...  
1082 Royant, A. (2012). Structure-guided evolution of cyan fluorescent proteins towards a  
1083 quantum yield of 93%. *Nature Communications*. <https://doi.org/10.1038/ncomms1738>
- 1084 Gottardi, C. J., & Gumbiner, B. M. (2004). Distinct molecular forms of  $\beta$ -catenin are targeted  
1085 to adhesive or transcriptional complexes. *Journal of Cell Biology*, 167(2), 339–349.  
1086 <https://doi.org/10.1083/jcb.200402153>
- 1087 Hampf, M., & Gossen, M. (2006). A protocol for combined Photinus and Renilla luciferase

- 1088            quantification compatible with protein assays. *Analytical Biochemistry*, 356(1), 94–99.
- 1089            <https://doi.org/10.1016/j.ab.2006.04.046>
- 1090    Hendriksen, J., Jansen, M., Brown, C. M., van der Velde, H., van Ham, M., Galjart, N., ...
- 1091            Fornerod, M. (2008). Plasma membrane recruitment of dephosphorylated  $\beta$ -catenin
- 1092            upon activation of the Wnt pathway. *Journal of Cell Science*, 121(11), 1793–1802.
- 1093            <https://doi.org/10.1242/jcs.025536>
- 1094    Hink, M. a. (2014). Quantifying intracellular dynamics using fluorescence fluctuation
- 1095            spectroscopy. *Protoplasma*, 251(2), 307–316. [https://doi.org/10.1007/s00709-013-](https://doi.org/10.1007/s00709-013-0602-z)
- 1096            0602-z
- 1097    Holstein, T. W. (2012). The evolution of the wnt pathway. *Cold Spring Harbor Perspectives in*
- 1098            *Biology*, 4(7), 1–17. <https://doi.org/10.1101/cshperspect.a007922>
- 1099    Holzmann, J., Politi, A. Z., Nagasaka, K., Hantsche-Grininger, M., Walther, N., Koch, B., ...
- 1100            Peters, J.-M. (2019). Absolute quantification of cohesin, CTCF and their regulators in
- 1101            human cells. *ELife*, 8, 1–31. <https://doi.org/10.7554/elife.46269>
- 1102    Howard, S., Deroo, T., Fujita, Y., & Itasaki, N. (2011). A positive role of cadherin in Wnt/ $\beta$ -
- 1103            catenin signalling during epithelial-mesenchymal transition. *PloS One*, 6(8), e23899.
- 1104            <https://doi.org/10.1371/journal.pone.0023899>
- 1105    Hu, M., Kurobe, M., Jeong, Y. J., Fuerer, C., Ghole, S., Nusse, R., & Sylvester, K. G. (2007).
- 1106            Wnt/ $\beta$ -catenin signaling in murine hepatic transit amplifying progenitor cells.
- 1107            *Gastroenterology*, 133(5), 1579–1591. <https://doi.org/10.1053/j.gastro.2007.08.036>
- 1108    Jacobsen, A., Heijmans, N., Verkaar, F., Smit, M. J., Heringa, J., van Amerongen, R., &
- 1109            Feenstra, K. A. (2016). Construction and experimental validation of a Petri net model of

- 1110 Wnt/ $\beta$ -catenin signaling. *PLoS ONE*, *11*(5), 1–30. <https://doi.org/10.1101/044966>
- 1111 Jamieson, C., Sharma, M., & Henderson, B. R. (2011). Regulation of  $\beta$ -catenin nuclear  
1112 dynamics by GSK-3 $\beta$  involves a LEF-1 positive feedback loop. *Traffic*, *12*(8), 983–999.  
1113 <https://doi.org/10.1111/j.1600-0854.2011.01207.x>
- 1114 Kafri, P., Hasenson, S. E., Kanter, I., Sheinberger, J., Kinor, N., Yunger, S., & Shav-Tal, Y.  
1115 (2016). Quantifying  $\beta$ -catenin subcellular dynamics and cyclin D1 mRNA transcription  
1116 during Wnt signaling in single living cells. *ELife*, *5*(NOVEMBER2016), 1–29.  
1117 <https://doi.org/10.7554/eLife.16748>
- 1118 Kaur, G., Costa, M. W., Nefzger, C. M., Silva, J., Fierro-González, J. C., Polo, J. M., ... Plachta,  
1119 N. (2013). Probing transcription factor diffusion dynamics in the living mammalian  
1120 embryo with photoactivatable fluorescence correlation spectroscopy. *Nature*  
1121 *Communications*, *4*(1), 1637. <https://doi.org/10.1038/ncomms2657>
- 1122 Keller, B. M., Maier, J., Secker, K. A., Egetemaier, S. M., Parfyonova, Y., Rothbauer, U., &  
1123 Traenkle, B. (2018). Chromobodies to quantify changes of endogenous protein  
1124 concentration in living cells. *Molecular and Cellular Proteomics*, *17*(12), 2518–2533.  
1125 <https://doi.org/10.1074/mcp.TIR118.000914>
- 1126 Kitazawa, M., Hatta, T., Ogawa, K., Fukuda, E., Goshima, N., & Natsume, T. (2017).  
1127 Determination of rate-limiting factor for formation of beta-catenin destruction  
1128 complexes using absolute protein quantification. *Journal of Proteome Research*, *16*(10),  
1129 3576–3584. <https://doi.org/10.1021/acs.jproteome.7b00305>
- 1130 Kormish, J. D., Sinner, D., & Zorn, A. M. (2010). Interactions between SOX factors and  
1131 Wnt/ $\beta$ -catenin signaling in development and disease. *Developmental Dynamics*, *239*(1),

- 1132 56–68. <https://doi.org/10.1002/dvdy.22046>
- 1133 Kotecki, M., Reddy, P. S. S., & Cochran, B. H. (1999). Isolation and characterization of a near-  
1134 haploid human cell line. *Experimental Cell Research*, *252*(2), 273–280.  
1135 <https://doi.org/10.1006/excr.1999.4656>
- 1136 Kremers, G.-J., Goedhart, J., van den Heuvel, D. J., Gerritsen, H. C., & Gadella, T. W. J. (2007).  
1137 Improved green and blue fluorescent proteins for expression in bacteria and  
1138 mammalian cells. *Biochemistry*, *46*(12), 3775–3783. <https://doi.org/10.1021/bi0622874>
- 1139 Kremers, G. J., Goedhart, J., Van Munster, E. B., Gadella, T. W. J. J., Munster, E. B. Van, &  
1140 Gadella, T. W. J. J. (2006). Cyan and yellow super fluorescent proteins with improved  
1141 brightness , protein folding , and FRET förster radius. *Biochemistry*, *45*(21), 6570–6580.  
1142 <https://doi.org/10.1021/bi0516273>
- 1143 Krieghoff, E., Behrens, J., & Mayr, B. (2006). Nucleo-cytoplasmic distribution of  $\beta$ -catenin is  
1144 regulated by retention. *Journal of Cell Science*, *119*(7), 1453–1463.  
1145 <https://doi.org/10.1242/jcs.02864>
- 1146 Kunttas-Tatli, E., Roberts, D. M., & McCartney, B. M. (2014). Self-association of the APC  
1147 tumor suppressor is required for the assembly, stability, and activity of the Wnt  
1148 signaling destruction complex. *Molecular Biology of the Cell*, *25*(21), 3424–3436.  
1149 <https://doi.org/10.1091/mbc.E14-04-0885>
- 1150 Lam, C. S., Mistri, T. K., Foo, Y. H., Sudhaharan, T., Gan, H. T., Rodda, D., ... Ahmed, S. (2012).  
1151 DNA-dependent Oct4-Sox2 interaction and diffusion properties characteristic of the  
1152 pluripotent cell state revealed by fluorescence spectroscopy. *Biochemical Journal*,  
1153 *448*(1), 21–33. <https://doi.org/10.1042/BJ20120725>



- 1154 Latres, E., Chiaur, D. S., & Pagano, M. (1999). The human F box protein  $\beta$ -Trcp associates  
1155 with the Cul1/Skp1 complex and regulates the stability of  $\beta$ -catenin. *Oncogene*, *18*(4),  
1156 849–854. <https://doi.org/10.1038/sj.onc.1202653>
- 1157 Lebensohn, A. A. M., Dubey, R., Neitzel, L. R., Tacchelly-Benites, O., Yang, E., Marceau, C. D.,  
1158 ... Ahmed, Y. (2016). Comparative genetic screens in human cells reveal new regulatory  
1159 mechanisms in WNT signaling. *ELife*, *5*, e21459. <https://doi.org/10.7554/eLife.21459>
- 1160 Lee, E., Salic, A., Krüger, R., Heinrich, R., & Kirschner, M. W. (2003). The roles of APC and  
1161 axin derived from experimental and theoretical analysis of the Wnt pathway. *PLoS*  
1162 *Biology*, *1*(1), 116–132. <https://doi.org/10.1371/journal.pbio.0000010>
- 1163 Li, V. S. W., Ng, S. S., Boersema, P. J., Low, T. Y., Karthaus, W. R., Gerlach, J. P., ... Clevers, H.  
1164 (2012). Wnt signaling through inhibition of  $\beta$ -catenin degradation in an intact Axin1  
1165 complex. *Cell*, *149*(6), 1245–1256. <https://doi.org/10.1016/j.cell.2012.05.002>
- 1166 Lim, X., Tan, S., Koh, W. W. L. C., Chau, R., Yan, K., Kuo, C. J., ... Nusse, R. (2013).  
1167 Interfollicular epidermal stem cells self-renew via autocrine Wnt signaling. *Science*,  
1168 *342*(December), 1226–1230. <https://doi.org/10.1126/science.1239730>. Interfollicular
- 1169 Liu, C., Li, Y., Semenov, M., Han, C., Baeg, G.-H. H., Tan, Y., ... He, X. (2002). Control of  $\beta$ -  
1170 catenin phosphorylation/degradation by a dual-kinase mechanism. *Cell*, *108*(6), 837–  
1171 847. [https://doi.org/10.1016/S0092-8674\(02\)00685-2](https://doi.org/10.1016/S0092-8674(02)00685-2)
- 1172 Liu, X., Rubin, J. S., & Kimmel, A. R. (2005). Rapid, Wnt-induced changes in GSK3 $\beta$   
1173 associations that regulate  $\beta$ -catenin stabilization are mediated by G $\alpha$  proteins. *Current*  
1174 *Biology*, *15*(22), 1989–1997. <https://doi.org/10.1016/j.cub.2005.10.050>
- 1175 Livak, K. J., & Schmittgen, T. D. (2001). Analysis of relative gene expression data using real-

- 1176 time quantitative PCR and the 2- $\Delta\Delta$ CT method. *Methods*, 25(4), 402–408.
- 1177 <https://doi.org/10.1006/meth.2001.1262>
- 1178 Loh, K. M., van Amerongen, R., & Nusse, R. (2016). Generating cellular diversity and spatial  
1179 form: Wnt signaling and the evolution of multicellular animals. *Developmental Cell*,  
1180 38(6), 643–655. <https://doi.org/10.1016/j.devcel.2016.08.011>
- 1181 Lui, T. T. H., Lacroix, C., Ahmed, S. M., Goldenberg, S. J., Leach, C. A., Daulat, A. M., & Angers,  
1182 S. (2011). The ubiquitin-specific protease USP34 regulates Axin stability and Wnt/ $\beta$ -  
1183 Catenin Signaling. *Molecular and Cellular Biology*, 31(10), 2053–2065.  
1184 <https://doi.org/10.1128/mcb.01094-10>
- 1185 Lustig, B., Jerchow, B., Sachs, M., Weiler, S., Pietsch, T., Karsten, U., ... Behrens, J. (2002).  
1186 Negative feedback loop of Wnt signaling through upregulation of conductin/axin2 in  
1187 colorectal and liver tumors. *Molecular and Cellular Biology*, 22(4), 1184–1193.  
1188 <https://doi.org/10.1128/mcb.22.4.1184-1193.2002>
- 1189 Macháň, R., & Wohland, T. (2014). Recent applications of fluorescence correlation  
1190 spectroscopy in live systems. *FEBS Letters*, 588(19), 3571–3584.  
1191 <https://doi.org/10.1016/j.febslet.2014.03.056>
- 1192 Mahen, R., Koch, B., Wachsmuth, M., Politi, A. Z., Perez-gonzalez, A., Mergenthaler, J., ...  
1193 Lippincott-schwartz, J. (2014). Comparative assessment of fluorescent transgene  
1194 methods for quantitative imaging in human cells. *Molecular Biology of the Cell*, 25,  
1195 3610–3618. <https://doi.org/10.1091/mbc.E14-06-1091>
- 1196 Maher, M. T., Mo, R., Flozak, A. S., Peled, O. N., & Gottardi, C. J. (2010).  $\beta$ -Catenin  
1197 phosphorylated at Serine 45 is spatially uncoupled from  $\beta$ -Catenin phosphorylated in

- 1198 the GSK3 domain: Implications for signaling. *PLoS ONE*, 5(4), e10184.
- 1199 <https://doi.org/10.1371/journal.pone.0010184>
- 1200 Massey, J., Liu, Y., Alvarenga, O., Saez, T., Schmerer, M., & Warmflash, A. (2019). Synergy  
1201 with TGF $\beta$  ligands switches WNT pathway dynamics from transient to sustained during  
1202 human pluripotent cell differentiation. *Proceedings of the National Academy of  
1203 Sciences of the United States of America*, 116(11), 4989–4998.
- 1204 <https://doi.org/10.1073/pnas.1815363116>
- 1205 Mendoza-Topaz, C., Mieszczanek, J., & Bienz, M. (2011). The Adenomatous polyposis coli  
1206 tumour suppressor is essential for Axin complex assembly and function and opposes  
1207 Axin's interaction with Dishevelled. *Open Biology*, 1(3), 110013.
- 1208 <https://doi.org/10.1098/rsob.110013>
- 1209 Molenaar, M., van de Wetering, M., Oosterwegel, M., Peterson-Maduro, J., Godsave, S.,  
1210 Korinek, V., ... Clevers, H. (1996). XTcf-3 transcription factor mediates beta-catenin-  
1211 induced axis formation in *Xenopus* embryos. *Cell*, 86(3), 391–399.
- 1212 [https://doi.org/10.1016/S0092-8674\(00\)80112-9](https://doi.org/10.1016/S0092-8674(00)80112-9)
- 1213 Nusse, R., & Clevers, H. (2017). Wnt/ $\beta$ -Catenin signaling, disease, and emerging therapeutic  
1214 modalities. *Cell*, 169(6), 985–999. <https://doi.org/10.1016/j.cell.2017.05.016>
- 1215 Olmeda, D., Castel, S., Vilaró, S., & Cano, A. (2003).  $\beta$ -Catenin regulation during the cell  
1216 cycle: Implications in G2/M and apoptosis. *Molecular Biology of the Cell*, 14(7), 2844–  
1217 2860. <https://doi.org/10.1091/mbc.e03-01-0865>
- 1218 Pack, C. G., Yukii, H., Toh-E, A., Kudo, T., Tsuchiya, H., Kaiho, A., ... Saeki, Y. (2014).  
1219 Quantitative live-cell imaging reveals spatio-temporal dynamics and cytoplasmic

- 1220 assembly of the 26S proteasome. *Nature Communications*, 5(1), 3396.
- 1221 <https://doi.org/10.1038/ncomms4396>
- 1222 Pack, C., Saito, K., Tamura, M., & Kinjo, M. (2006). Microenvironment and effect of energy  
1223 depletion in the nucleus analyzed by mobility of multiple oligomeric EGFPs. *Biophysical*  
1224 *Journal*, 91(10), 3921–3936. <https://doi.org/10.1529/biophysj.105.079467>
- 1225 Petrášek, Z., & Schwille, P. (2008). Precise measurement of diffusion coefficients using  
1226 scanning fluorescence correlation spectroscopy. *Biophysical Journal*, 94(4), 1437–1448.  
1227 <https://doi.org/10.1529/biophysj.107.108811>
- 1228 Polakis, P. (2000). Wnt signaling and cancer. *Genes & Development*, 14(15), 1837–1851.  
1229 <https://doi.org/10.1038/nature03319>
- 1230 Pronobis, M. I., Deutch, N., Posham, V., Mimori-Kiyosue, Y., & Peifer, M. (2017).  
1231 Reconstituting regulation of the canonical Wnt pathway by engineering a minimal  $\beta$ -  
1232 catenin destruction machine. *Molecular Biology of the Cell*, 28(1), 41–53.  
1233 <https://doi.org/10.1091/mbc.E16-07-0557>
- 1234 Pronobis, M. I., Rusan, N. M., & Peifer, M. (2015). A novel GSK3-regulated APC:Axin  
1235 interaction regulates Wnt signaling by driving a catalytic cycle of efficient  $\beta$ catenin  
1236 destruction. *ELife*, 4(September 2015), 1–31. <https://doi.org/10.7554/eLife.08022>
- 1237 Ran, F. A., Hsu, P. D., Wright, J., Agarwala, V., Scott, D. a, & Zhang, F. (2013). Genome  
1238 engineering using the CRISPR-Cas9 system. *Nature Protocols*, 8(11), 2281–2308.  
1239 <https://doi.org/10.1038/nprot.2013.143>
- 1240 Rim, E. Y., Kinney, L. K., & Nusse, R. (2020). Beta-catenin-mediated Wnt signal transduction  
1241 proceeds through an endocytosis-independent mechanism. *Molecular Biology of the*

- 1242 *Cell*, mbc.E20-02-0114. <https://doi.org/10.1091/mbc.E20-02-0114>
- 1243 Sayat, R., Leber, B., Grubac, V., Wiltshire, L., & Persad, S. (2008). O-GlcNAc-glycosylation of  
1244  $\beta$ -catenin regulates its nuclear localization and transcriptional activity. *Experimental*  
1245 *Cell Research*, 314(15), 2774–2787. <https://doi.org/10.1016/j.yexcr.2008.05.017>
- 1246 Schaefer, K. N., Bonello, T. T., Zhang, S., Williams, C. E., Roberts, D. M., McKay, D. J., &  
1247 Peifer, M. (2018). *Supramolecular assembly of the beta-catenin destruction complex*  
1248 *and the effect of Wnt signaling on its localization, molecular size, and activity in vivo*.  
1249 *PLoS Genetics* (Vol. 14). Retrieved from  
1250 [http://journals.plos.org/plosgenetics/article/file?id=10.1371/journal.pgen.1007339&ty](http://journals.plos.org/plosgenetics/article/file?id=10.1371/journal.pgen.1007339&type=printable)  
1251 [pe=printable](http://journals.plos.org/plosgenetics/article/file?id=10.1371/journal.pgen.1007339&type=printable)
- 1252 Schaefer, K. N., & Peifer, M. (2019). Wnt/beta-catenin signaling regulation and a role for  
1253 biomolecular condensates. *Developmental Cell*, 48(4), 429–444.  
1254 <https://doi.org/10.1016/j.devcel.2019.01.025>
- 1255 Schaefer, K. N., Pronobis, M., Williams, C. E., Zhang, S., Bauer, L., Goldfarb, D., ... Peifer, M.  
1256 (2020). Wnt regulation: Exploring Axin-Disheveled interactions and defining  
1257 mechanisms by which the SCF E3 ubiquitin ligase is recruited to the destruction  
1258 complex. *Molecular Biology of the Cell*, mbcE19110647.  
1259 <https://doi.org/10.1091/mbc.e19-11-0647>
- 1260 Schmittgen, T. D., & Livak, K. J. (2008). Analyzing real-time PCR data by the comparative CT  
1261 method. *Nature Protocols*, 3(6), 1101–1108. <https://doi.org/10.1038/nprot.2008.73>
- 1262 Schmitz, Y., Rateitschak, K., & Wolkenhauer, O. (2013). Analysing the impact of nucleo-  
1263 cytoplasmic shuttling of  $\beta$ -catenin and its antagonists APC, Axin and GSK3 on Wnt/ $\beta$ -

- 1264        catenin signalling. *Cellular Signalling*, 25(11), 2210–2221.
- 1265        <https://doi.org/10.1016/j.cellsig.2013.07.005>
- 1266        Schuijers, J., Mokry, M., Hatzis, P., Cuppen, E., & Clevers, H. (2014). Wnt-induced  
1267        transcriptional activation is exclusively mediated by TCF/LEF. *EMBO Journal*, 33(2),  
1268        146–156. <https://doi.org/10.1002/emboj.201385358>
- 1269        Schwarz-Romond, T., Fiedler, M., Shibata, N., Butler, P. J. G., Kikuchi, A., Higuchi, Y., & Bienz,  
1270        M. (2007). The DIX domain of Dishevelled confers Wnt signaling by dynamic  
1271        polymerization. *Nature Structural and Molecular Biology*, 14(6), 484–492.  
1272        <https://doi.org/10.1038/nsmb1247>
- 1273        Spink, K. E., Polakis, P., & Weis, W. I. (2000). Structural basis of the Axin–adenomatous  
1274        polyposis coli interaction. *The EMBO Journal*, 19(10), 2270–2279.  
1275        <https://doi.org/10.1093/emboj/19.10.2270>
- 1276        Stamos, J. L., Chu, M. L.-H. H., Enos, M. D., Shah, N., & Weis, W. I. (2014). Structural basis of  
1277        GSK-3 inhibition by N-terminal phosphorylation and by the Wnt receptor LRP6. *eLife*,  
1278        2014(3), e01998. <https://doi.org/10.7554/eLife.01998>
- 1279        Taelman, V. F., Dobrowolski, R., Plouhinec, J. L., Fuentealba, L. C., Vorwald, P. P., Gumper, I.,  
1280        ... De Robertis, E. M. (2010). Wnt signaling requires sequestration of Glycogen Synthase  
1281        Kinase 3 inside multivesicular endosomes. *Cell*, 143(7), 1136–1148.  
1282        <https://doi.org/10.1016/j.cell.2010.11.034>
- 1283        Tan, C. W., Gardiner, B. S., Hirokawa, Y., Layton, M. J., Smith, D. W., & Burgess, A. W. (2012).  
1284        Wnt signalling pathway parameters for mammalian cells. *PLoS ONE*, 7(2), 31882.  
1285        <https://doi.org/10.1371/journal.pone.0031882>

- 1286 Tan, C. W., Gardiner, B. S., Hirokawa, Y., Smith, D. W., & Burgess, A. W. (2014). Analysis of  
1287 Wnt signaling  $\beta$ -catenin spatial dynamics in HEK293T cells. *BMC Systems Biology*, *8*(1),  
1288 44. <https://doi.org/10.1186/1752-0509-8-44>
- 1289 Thorvaldsen, T. E., Pedersen, N. M., Wenzel, E. M., Schultz, S. W., Brech, A., Liestøl, K., ...  
1290 Stenmark, H. (2015). Structure, dynamics, and functionality of tankyrase inhibitor-  
1291 induced degradasomes. *Molecular Cancer Research*, *13*(11), 1487–1501.  
1292 <https://doi.org/10.1158/1541-7786.MCR-15-0125>
- 1293 Tortelote, G. G., Reis, R. R., de Almeida Mendes, F., & Abreu, J. G. (2017). Complexity of the  
1294 Wnt/ $\beta$ -catenin pathway: Searching for an activation model. *Cellular Signalling*,  
1295 *40*(May), 30–43. <https://doi.org/10.1016/j.cellsig.2017.08.008>
- 1296 Traenkle, B., Emele, F., Anton, R., Poetz, O., Haeussler, R. S., Maier, J., ... Rothbauer, U.  
1297 (2015). Monitoring interactions and dynamics of endogenous beta-catenin with  
1298 intracellular nanobodies in living cells. *Molecular & Cellular Proteomics*, *14*(3), 707–723.  
1299 <https://doi.org/10.1074/mcp.M114.044016>
- 1300 Tran, H., & Polakis, P. (2012). Reversible modification of adenomatous polyposis coli (APC)  
1301 with K63-linked polyubiquitin regulates the assembly and activity of the  $\beta$ -catenin  
1302 destruction complex. *Journal of Biological Chemistry*, *287*(34), 28552–28563.  
1303 <https://doi.org/10.1074/jbc.M112.387878>
- 1304 Valenta, T., Hausmann, G., & Basler, K. (2012). The many faces and functions of  $\beta$ -catenin.  
1305 *The EMBO Journal*, *31*(12), 2714–2736. <https://doi.org/10.1038/emboj.2012.150>
- 1306 van Amerongen, R., Bowman, A. N., & Nusse, R. (2012). Developmental stage and time  
1307 dictate the fate of Wnt/ $\beta$ -catenin-responsive stem cells in the mammary gland. *Cell*

- 1308        *Stem Cell*, 11(3), 387–400. <https://doi.org/10.1016/j.stem.2012.05.023>
- 1309    van Amerongen, R., & Nusse, R. (2009). Towards an integrated view of Wnt signaling in  
1310        development. *Development*, 136(19), 3205–3214. <https://doi.org/10.1242/dev.033910>
- 1311    van Leeuwen, I. M. M., Byrne, H. M., Jensen, O. E., & King, J. R. (2007). Elucidating the  
1312        interactions between the adhesive and transcriptional functions of  $\beta$ -catenin in normal  
1313        and cancerous cells. *Journal of Theoretical Biology*, 247(1), 77–102.  
1314        <https://doi.org/10.1016/j.jtbi.2007.01.019>
- 1315    van Tienen, L. M., Mieszczanek, J., Fiedler, M., Rutherford, T. J., & Bienz, M. (2017).  
1316        Constitutive scaffolding of multiple Wnt enhanceosome components by legless/BCL9.  
1317        *ELife*, 6, 1–23. <https://doi.org/10.7554/eLife.20882>
- 1318    Wachsmuth, M., Waldeck, W., & Langowski, J. (2000). Anomalous diffusion of fluorescent  
1319        probes inside living cell investigated by spatially-resolved fluorescence correlation  
1320        spectroscopy. *Journal of Molecular Biology*, 298(4), 677–689.  
1321        <https://doi.org/10.1006/jmbi.2000.3692>
- 1322    Wiechens, N., & Fagotto, F. (2001). CRM1- and Ran-independent nuclear export of  $\beta$ -  
1323        catenin. *Current Biology*, 11(1), 18–28. [https://doi.org/10.1016/S0960-9822\(00\)00045-](https://doi.org/10.1016/S0960-9822(00)00045-2)  
1324        2
- 1325    Wiese, K. E., Nusse, R., & van Amerongen, R. (2018). Wnt signalling: conquering complexity.  
1326        *Development*, 145(12), dev165902. <https://doi.org/10.1242/dev.165902>
- 1327    Wu, X., Tu, X., Joeng, K. S., Hilton, M. J., Williams, D. A., & Long, F. (2008). Rac1 Activation  
1328        Controls Nuclear Localization of  $\beta$ -catenin during Canonical Wnt Signaling. *Cell*, 133(2),  
1329        340–353. <https://doi.org/10.1016/j.cell.2008.01.052>



- 1330 Yaguchi, K., Yamamoto, T., Matsui, R., Tsukada, Y., Shibamura, A., Kamimura, K., ... Uehara,  
1331 R. (2018). Uncoordinated centrosome cycle underlies the instability of non-diploid  
1332 somatic cells in mammals. *The Journal of Cell Biology*, 217(7), 2463–2483.  
1333 <https://doi.org/10.1083/jcb.201701151>
- 1334 Yap, A. S., Brieher, W. M., & Gumbiner, B. M. (1997). Molecular and functional analysis of  
1335 cadherin-based adherens junctions. *Annual Review of Cell and Developmental Biology*,  
1336 13(1), 119–146. <https://doi.org/10.1146/annurev.cellbio.13.1.119>
- 1337 Yokoya, F., Imamoto, N., Tachibana, T., & Yoneda, Y. (1999).  $\beta$ -Catenin can be transported  
1338 into the nucleus in a ran-unassisted manner. *Molecular Biology of the Cell*, 10(4), 1119–  
1339 1131. <https://doi.org/10.1091/mbc.10.4.1119>
- 1340 Yokoyama, N., Markova, N. G., Wang, H., & Malbon, C. C. (2012). Assembly of Dishevelled 3-  
1341 based supermolecular complexes via phosphorylation and Axin. *Journal of Molecular*  
1342 *Signaling*, 7(0), 8. <https://doi.org/10.1186/1750-2187-7-8>
- 1343 Zhan, T., Rindtorff, N., & Boutros, M. (2017). Wnt signaling in cancer. *Oncogene*, 36(11),  
1344 1461–1473. <https://doi.org/10.1038/onc.2016.304>
- 1345

## 1346 Supplementary Movie legends

1347 **Supplementary Movie 1-3:** Representative movies of confocal time-lapse experiments, showing  
1348 SGFP2-CTNNB1 (left, green), SiR-DNA staining (middle, magenta) and transmission image (right, grey)  
1349 after treatment with vehicle control (BSA) (**Supplementary Movie 1**), 100 ng/ml WNT3A  
1350 (**Supplementary Movie 2**) or 8  $\mu$ M CHIR99021 (**Supplementary Movie 3**). Time of addition is at  
1351 00:00:00 (indicated at the top left). Scale bar in the lower right represents 20 $\mu$ m.

1352 **Supplementary Movie 4-6:** Movies showing the quantification of time-lapse microscopy series (from  
1353 Figure 4 and Supplementary Movie 1-3) at each time point showing all individual cells from 3 biological  
1354 experiments. Time of addition of the indicated substances is at 00:00:00 (indicated at the top left).  
1355 The left graph represents the raw data (colored dots, each dot is one cell, n=155-400 cells for each  
1356 condition and time point), the median (black circle) and the 95% CI of the median (black bar). The right  
1357 graph represents the median difference (black circle) from the treatments to the control (BSA). When  
1358 the 95% CI (black bar) does not overlap 0, the difference between the two conditions is significant.

1359 **Supplementary Movie 4:** Quantification of the normalized intensity of SGFP2-CTNNB1 in the  
1360 cytoplasm. Significant changes in intensity can first be observed after 40 minutes of 8  $\mu$ M CHIR99021,  
1361 and after 70-80 minutes of 4  $\mu$ M CHIR99021 or 25-100ng/ml WNT3A treatment.

1362 **Supplementary Movie 5:** Quantification of the normalized intensity of SGFP2-CTNNB1 in the nucleus.  
1363 Significant changes in intensity can be observed for all treatments (but not controls) after 20-50  
1364 minutes.

1365 **Supplementary Movie 6:** Quantification of the nuclear-cytoplasmic ratio of SGFP2-CTNNB1, calculated  
1366 from raw intensity values underlying Supplementary Movies 4 and 5. Significant changes in the  
1367 nuclear-cytoplasmic ratio can be observed for all treatments (but not controls) after 20-50 minutes.
